# Supplementary material for: Antipsychotic olanzapine-induced misfolding of proinsulin in the endoplasmic reticulum accounts for atypical development of diabetes
Source: eLife. 2020 Nov 17;9:e60970. doi: 10.7554/eLife.60970 (PMC7671685; doi:10.7554/eLife.60970)
Supplement: Supplementary file 1. [file elife-60970-supp1.xlsx]

## Sheet: List of proteins
Protein IDs	Majority protein IDs	Peptide counts (all)	Peptide counts (razor+unique)	Peptide counts (unique)	Protein names	Gene names	Fasta headers	Intensity NT_1	Intensity NT_2	Intensity NT_3	Intensity OLA_1	Intensity OLA_2	Intensity OLA_3	median NT	median OLA	Number of proteins	Peptides	Razor + unique peptides	Unique peptides	Peptides NT_1	Peptides NT_2	Peptides NT_3	Peptides OLA_1	Peptides OLA_2	Peptides OLA_3	Razor + unique peptides NT_1	Razor + unique peptides NT_2	Razor + unique peptides NT_3	Razor + unique peptides OLA_1	Razor + unique peptides OLA_2	Razor + unique peptides OLA_3	Unique peptides NT_1	Unique peptides NT_2	Unique peptides NT_3	Unique peptides OLA_1	Unique peptides OLA_2	Unique peptides OLA_3	Sequence coverage [%]	Unique + razor sequence coverage [%]	Unique sequence coverage [%]	Mol. weight [kDa]	Sequence length	Sequence lengths	Q-value	Score	Sequence coverage NT_1 [%]	Sequence coverage NT_2 [%]	Sequence coverage NT_3 [%]	Sequence coverage OLA_1 [%]
A2A547;P84099	A2A547;P84099	7;7	7;7	7;7	Ribosomal protein L19;60S ribosomal protein L19	Rpl19	tr|A2A547|A2A547_MOUSE Ribosomal protein L19 OS=Mus musculus GN=Rpl19 PE=3 SV=1;sp|P84099|RL19_MOUSE 60S ribosomal protein L19 OS=Mus musculus GN=Rpl19 PE=1 SV=1	49655000	43316000	128650000	97246000	54413000	18589000	49655000	54413000	2	7	7	7	7	7	6	7	7	6	7	7	6	7	7	6	7	7	6	7	7	6	30.4	30.4	30.4	23.247	194	194;196	0	53.639	30.4	30.4	29.9	30.4
A6PWC3;A2A9Q2;Q8BHG1	A6PWC3;A2A9Q2;Q8BHG1	1;1;1	1;1;1	1;1;1	Nardilysin	Nrd1	tr|A6PWC3|A6PWC3_MOUSE Nardilysin OS=Mus musculus GN=Nrd1 PE=1 SV=1;tr|A2A9Q2|A2A9Q2_MOUSE Nardilysin OS=Mus musculus GN=Nrd1 PE=1 SV=1;sp|Q8BHG1|NRDC_MOUSE Nardilysin OS=Mus musculus GN=Nrd1 PE=1 SV=1	240680000	164530000	272740000	138460000	78615000	70907000	240680000	78615000	3	1	1	1	1	1	1	1	1	1	1	1	1	1	1	1	1	1	1	1	1	1	1.7	1.7	1.7	127.77	1117	1117;1229;1161	0.010014	5.7089	1.7	1.7	1.7	1.7
Q99N15;A2AFQ2;O08756	Q99N15;A2AFQ2;O08756	6;6;3	6;6;3	6;6;3	3-hydroxyacyl-CoA dehydrogenase type-2	Hsd17b10	tr|Q99N15|Q99N15_MOUSE 17beta-hydroxysteroid dehydrogenase type 10/short chain L-3-hydroxyacyl-CoA dehydrogenase OS=Mus musculus GN=Hsd17b10 PE=1 SV=1;tr|A2AFQ2|A2AFQ2_MOUSE 3-hydroxyacyl-CoA dehydrogenase type-2 OS=Mus musculus GN=Hsd17b10 PE=1 SV=1;sp|O0	12157000	1915900	20692000	16560000	2144900	190840	12157000	2144900	3	6	6	6	6	4	3	6	5	1	6	4	3	6	5	1	6	4	3	6	5	1	35.6	35.6	35.6	27.273	261	261;271;261	0	66.176	35.6	23.8	14.9	35.6
A2AG83;Q9Z2X2	A2AG83;Q9Z2X2	1;1	1;1	1;1	26S proteasome non-ATPase regulatory subunit 10	Psmd10	tr|A2AG83|A2AG83_MOUSE 26S proteasome non-ATPase regulatory subunit 10 OS=Mus musculus GN=Psmd10 PE=4 SV=1;sp|Q9Z2X2|PSD10_MOUSE 26S proteasome non-ATPase regulatory subunit 10 OS=Mus musculus GN=Psmd10 PE=1 SV=3	1792100	345900	101530	1574000	101500	115080	345900	115080	2	1	1	1	1	1	1	1	1	1	1	1	1	1	1	1	1	1	1	1	1	1	6.6	6.6	6.6	16.243	151	151;231	0	7.3866	6.6	6.6	6.6	6.6
A2AKH7;Q8JZX5;Q9D1G5;B0R031	A2AKH7;Q8JZX5;Q9D1G5	5;5;5;1	5;5;5;1	5;5;5;1	Leucine-rich repeat-containing protein 57	Lrrc57	tr|A2AKH7|A2AKH7_MOUSE Leucine-rich repeat-containing protein 57 (Fragment) OS=Mus musculus GN=Lrrc57 PE=4 SV=3;tr|Q8JZX5|Q8JZX5_MOUSE Leucine rich repeat containing 57 OS=Mus musculus GN=Lrrc57 PE=2 SV=1;sp|Q9D1G5|LRC57_MOUSE Leucine-rich repeat-containin	9181700	3290800	1091700	6002000	3955300	285720	3290800	3955300	4	5	5	5	5	5	2	5	5	2	5	5	2	5	5	2	5	5	2	5	5	2	21.9	21.9	21.9	24.288	219	219;239;239;124	0	31.053	21.9	21.9	6.8	21.9
A2AL12;Q8BG05;E9Q7H5;B2RXM2;J3QNY1;Q8BG05-2;A2AL13;V9GX38	A2AL12;Q8BG05;E9Q7H5;B2RXM2;J3QNY1;Q8BG05-2	7;7;6;6;6;6;1;1	7;7;6;6;6;6;1;1	7;7;6;6;6;6;1;1	Heterogeneous nuclear ribonucleoprotein A3	Hnrnpa3;Gm8991;Gm6793;Gm9242	tr|A2AL12|A2AL12_MOUSE Heterogeneous nuclear ribonucleoprotein A3 OS=Mus musculus GN=Hnrnpa3 PE=4 SV=1;sp|Q8BG05|ROA3_MOUSE Heterogeneous nuclear ribonucleoprotein A3 OS=Mus musculus GN=Hnrnpa3 PE=1 SV=1;tr|E9Q7H5|E9Q7H5_MOUSE Uncharacterized protein OS=Mu	4630100	4879700	81166000	8746800	6440100	2415000	4879700	6440100	8	7	7	7	5	7	7	7	7	6	5	7	7	7	7	6	5	7	7	7	7	6	28.9	28.9	28.9	34.476	318	318;379;300;351;357;357;194;357	0	52.24	17	28.9	28.9	28.9
A2AMW0;P47757-2;P47757;P47757-4;F7CAZ6	A2AMW0;P47757-2;P47757;P47757-4	3;3;3;3;1	3;3;3;3;1	3;3;3;3;1	F-actin-capping protein subunit beta	Capzb	tr|A2AMW0|A2AMW0_MOUSE Capping protein (Actin filament) muscle Z-line, beta, isoform CRA_a OS=Mus musculus GN=Capzb PE=1 SV=1;sp|P47757-2|CAPZB_MOUSE Isoform 2 of F-actin-capping protein subunit beta OS=Mus musculus GN=Capzb;sp|P47757|CAPZB_MOUSE F-actin-c	159870	185920	16514000	206490	107130	186200	185920	186200	5	3	3	3	1	1	3	1	1	1	1	1	3	1	1	1	1	1	3	1	1	1	12.3	12.3	12.3	29.295	260	260;272;277;301;204	0	21.215	3.8	3.8	12.3	3.8
A6ZI44;P05064;D3YWI1;D3YV98;D3Z510;Q9CPQ9;A6ZI46;A6ZI47	A6ZI44;P05064;D3YWI1;D3YV98;D3Z510;Q9CPQ9;A6ZI46;A6ZI47	13;13;11;10;9;9;9;8	13;13;11;10;9;9;9;8	13;13;11;10;9;9;9;8	Fructose-bisphosphate aldolase;Fructose-bisphosphate aldolase A	Aldoa;Aldoart1;Aldoart2	tr|A6ZI44|A6ZI44_MOUSE Fructose-bisphosphate aldolase OS=Mus musculus GN=Aldoa PE=2 SV=1;sp|P05064|ALDOA_MOUSE Fructose-bisphosphate aldolase A OS=Mus musculus GN=Aldoa PE=1 SV=2;tr|D3YWI1|D3YWI1_MOUSE Fructose-bisphosphate aldolase (Fragment) OS=Mus muscu	2350200	1138000	793420000	1345400	477690	4447700	2350200	1345400	8	13	13	13	5	3	13	4	3	8	5	3	13	4	3	8	5	3	13	4	3	8	30.9	30.9	30.9	45.12	418	418;364;237;193;131;364;419;364	0	119.61	8.9	8.6	30.9	8.9
B1ARA3;P61255;B1ARA5	B1ARA3;P61255;B1ARA5	5;5;3	5;5;3	5;5;3	60S ribosomal protein L26	Rpl26	tr|B1ARA3|B1ARA3_MOUSE 60S ribosomal protein L26 (Fragment) OS=Mus musculus GN=Rpl26 PE=4 SV=1;sp|P61255|RL26_MOUSE 60S ribosomal protein L26 OS=Mus musculus GN=Rpl26 PE=1 SV=1;tr|B1ARA5|B1ARA5_MOUSE 60S ribosomal protein L26 OS=Mus musculus GN=Rpl26 PE=1	941180	344460	72518000	262930	769050	656280	941180	656280	3	5	5	5	3	3	5	1	3	3	3	3	5	1	3	3	3	3	5	1	3	3	32	32	32	12.217	103	103;145;143	0	33.827	15.5	23.3	32	6.8
B1AT92;Q60631;Q60631-2;B1AT95	B1AT92;Q60631	5;5;2;1	5;5;2;1	5;5;2;1	Growth factor receptor-bound protein 2	Grb2	tr|B1AT92|B1AT92_MOUSE Growth factor receptor-bound protein 2 OS=Mus musculus GN=Grb2 PE=4 SV=1;sp|Q60631|GRB2_MOUSE Growth factor receptor-bound protein 2 OS=Mus musculus GN=Grb2 PE=1 SV=1	13816000	1639400	2976000	7785700	2215700	615610	2976000	2215700	4	5	5	5	5	3	2	5	4	3	5	3	2	5	4	3	5	3	2	5	4	3	24.1	24.1	24.1	23.587	203	203;217;176;71	0	31.257	24.1	15.8	11.3	24.1
B1AWZ5;Q9CQE1;G3X8S9;B1AWZ3	B1AWZ5;Q9CQE1;G3X8S9;B1AWZ3	2;2;1;1	2;2;1;1	2;2;1;1	Protein NipSnap homolog 3B	Nipsnap3b;Nipsnap3a	tr|B1AWZ5|B1AWZ5_MOUSE Protein NipSnap homolog 3B OS=Mus musculus GN=Nipsnap3b PE=1 SV=1;sp|Q9CQE1|NPS3B_MOUSE Protein NipSnap homolog 3B OS=Mus musculus GN=Nipsnap3b PE=1 SV=1;tr|G3X8S9|G3X8S9_MOUSE MCG117834, isoform CRA_a OS=Mus musculus GN=Nipsnap3a PE	4027800	783560	296630	3003800	491080	44387	783560	491080	4	2	2	2	2	2	1	2	2	1	2	2	1	2	2	1	2	2	1	2	2	1	8.1	8.1	8.1	22.887	197	197;247;245;247	0	11.902	8.1	8.1	3.6	8.1
B1AXW5;B1AXW6;P35700;B1AXW4	B1AXW5;B1AXW6;P35700;B1AXW4	6;6;6;3	5;5;5;3	5;5;5;3	Peroxiredoxin-1	Prdx1	tr|B1AXW5|B1AXW5_MOUSE Peroxiredoxin-1 (Fragment) OS=Mus musculus GN=Prdx1 PE=1 SV=3;tr|B1AXW6|B1AXW6_MOUSE Peroxiredoxin-1 (Fragment) OS=Mus musculus GN=Prdx1 PE=1 SV=1;sp|P35700|PRDX1_MOUSE Peroxiredoxin-1 OS=Mus musculus GN=Prdx1 PE=1 SV=1;tr|B1AXW4|B1A	4017300	912540	628170000	1929900	1600500	4946700	4017300	1929900	4	6	5	5	4	3	6	2	3	4	3	2	5	1	2	3	3	2	5	1	2	3	28.2	23.5	23.5	18.927	170	170;176;199;123	0	36.246	21.8	17.1	28.2	10.6
B7FAV1;B7FAU9;Q8BTM8;F6XC15;F6Z2C0;Q8BTM8-2	B7FAV1;B7FAU9;Q8BTM8	14;14;14;5;1;1	14;14;14;5;1;1	11;11;11;3;1;1	Filamin-A	Flna	tr|B7FAV1|B7FAV1_MOUSE Filamin, alpha (Fragment) OS=Mus musculus GN=Flna PE=1 SV=1;tr|B7FAU9|B7FAU9_MOUSE Filamin, alpha OS=Mus musculus GN=Flna PE=1 SV=1;sp|Q8BTM8|FLNA_MOUSE Filamin-A OS=Mus musculus GN=Flna PE=1 SV=5	215850	259750	85127000	176000	207760	293180	259750	207760	6	14	14	11	1	2	14	1	1	2	1	2	14	1	1	2	1	1	11	1	1	2	5.6	5.6	4.6	274.63	2583	2583;2639;2647;511;281;249	0	97.285	0.3	0.7	5.6	0.4
D3YWT1;D3Z3N4	D3YWT1;D3Z3N4	5;5	5;5	5;5		Hnrnph3	tr|D3YWT1|D3YWT1_MOUSE MCG11326, isoform CRA_b OS=Mus musculus GN=Hnrnph3 PE=4 SV=1;tr|D3Z3N4|D3Z3N4_MOUSE MCG11326, isoform CRA_a OS=Mus musculus GN=Hnrnph3 PE=4 SV=1	25287000	25584000	20397000	30385000	34961000	8463200	25287000	30385000	2	5	5	5	5	5	4	5	5	5	5	5	4	5	5	5	5	5	4	5	5	5	29.3	29.3	29.3	35.181	331	331;346	0	52.986	29.3	29.3	21.5	29.3
E9Q7G1;D3YZZ5	E9Q7G1;D3YZZ5	5;5	5;5	5;5		Tmed7	tr|E9Q7G1|E9Q7G1_MOUSE Protein Tmed7 OS=Mus musculus GN=Tmed7 PE=3 SV=1;tr|D3YZZ5|D3YZZ5_MOUSE Protein Tmed7 OS=Mus musculus GN=Tmed7 PE=3 SV=1	40919000	6456200	2205700	29889000	7039100	1646100	6456200	7039100	2	5	5	5	5	4	1	5	4	3	5	4	1	5	4	3	5	4	1	5	4	3	25	25	25	21.276	188	188;224	0	48.556	25	18.1	5.3	25
D3Z227;O88587-2;O88587	D3Z227;O88587-2;O88587	2;2;2	2;2;2	2;2;2	Catechol O-methyltransferase	Comt	tr|D3Z227|D3Z227_MOUSE Catechol O-methyltransferase (Fragment) OS=Mus musculus GN=Comt PE=4 SV=1;sp|O88587-2|COMT_MOUSE Isoform Soluble of Catechol O-methyltransferase OS=Mus musculus GN=Comt;sp|O88587|COMT_MOUSE Catechol O-methyltransferase OS=Mus musculu	4570000	2921300	1663700	1360800	3363500	162600	2921300	1360800	3	2	2	2	2	2	1	2	2	1	2	2	1	2	2	1	2	2	1	2	2	1	11.1	11.1	11.1	18.936	171	171;222;265	0	11.584	11.1	11.1	5.3	11.1
D3Z6H3;Q9WUB4;F6XWI6;D3Z4E5	D3Z6H3;Q9WUB4;F6XWI6;D3Z4E5	3;3;2;2	3;3;2;2	3;3;2;2	Dynactin subunit 6	Dctn6	tr|D3Z6H3|D3Z6H3_MOUSE Dynactin 6, isoform CRA_b OS=Mus musculus GN=Dctn6 PE=4 SV=1;sp|Q9WUB4|DCTN6_MOUSE Dynactin subunit 6 OS=Mus musculus GN=Dctn6 PE=1 SV=1;tr|F6XWI6|F6XWI6_MOUSE Dynactin subunit 6 (Fragment) OS=Mus musculus GN=Dctn6 PE=4 SV=1;tr|D3Z4E	7999600	2303200	1049800	4599600	2006200	427240	2303200	2006200	4	3	3	3	3	3	2	3	3	2	3	3	2	3	3	2	3	3	2	3	3	2	14.6	14.6	14.6	20.041	185	185;190;163;195	0	19.579	14.6	14.6	9.7	14.6
E0CXX7;P01326;P01325	E0CXX7;P01326;P01325	4;4;2	4;4;2	2;2;2	Insulin-2;Insulin-2 B chain;Insulin-2 A chain;Insulin-1;Insulin-1 B chain;Insulin-1 A chain	Ins2;Ins1	tr|E0CXX7|E0CXX7_MOUSE Insulin-2 OS=Mus musculus GN=Ins2 PE=3 SV=1;sp|P01326|INS2_MOUSE Insulin-2 OS=Mus musculus GN=Ins2 PE=1 SV=1;sp|P01325|INS1_MOUSE Insulin-1 OS=Mus musculus GN=Ins1 PE=1 SV=1	50344000	30010000	9301400	171730000	229370000	37979000	30010000	171730000	3	4	4	2	3	2	1	3	3	2	3	2	1	3	3	2	1	1	0	1	2	1	51	51	22.4	11.314	98	98;110;108	0	31.336	51	31.6	9.2	51
F7D432;E9PWE0;E0CYV0;P23506;P23506-2;F6V9F1;F6TXE3	F7D432;E9PWE0;E0CYV0;P23506;P23506-2;F6V9F1	17;17;17;17;17;9;4	17;17;17;17;17;9;4	17;17;17;17;17;9;4	Protein-L-isoaspartate O-methyltransferase;Protein-L-isoaspartate(D-aspartate) O-methyltransferase	Pcmt1	tr|F7D432|F7D432_MOUSE Protein-L-isoaspartate O-methyltransferase (Fragment) OS=Mus musculus GN=Pcmt1 PE=3 SV=1;tr|E9PWE0|E9PWE0_MOUSE Protein-L-isoaspartate O-methyltransferase OS=Mus musculus GN=Pcmt1 PE=3 SV=1;tr|E0CYV0|E0CYV0_MOUSE Protein-L-isoasparta	917260000	240690000	70527000	509660000	243720000	68429000	240690000	243720000	7	17	17	17	17	16	13	17	16	14	17	16	13	17	16	14	17	16	13	17	16	14	58.7	58.7	58.7	29.167	271	271;285;286;227;228;177;111	0	210.15	58.7	46.1	45.8	58.7
E9PZF0;Q01768	E9PZF0;Q01768	6;6	6;6	3;3	Nucleoside diphosphate kinase;Nucleoside diphosphate kinase B	Gm20390;Nme2	tr|E9PZF0|E9PZF0_MOUSE Nucleoside diphosphate kinase OS=Mus musculus GN=Gm20390 PE=3 SV=1;sp|Q01768|NDKB_MOUSE Nucleoside diphosphate kinase B OS=Mus musculus GN=Nme2 PE=1 SV=1	665870	561440	198770000	249270	149980	1758600	665870	249270	2	6	6	3	2	2	6	1	1	4	2	2	6	1	1	4	1	1	3	0	0	2	40.1	40.1	11.6	30.2	267	267;152	0	47.767	14.2	14.2	40.1	9
E9Q9J0;E9Q4P0;E9Q5F6;E9QNP0;Q5SX22;P62984;P62983;P0CG49;P0CG50;J3QK04;D3YYZ2	E9Q9J0;E9Q4P0;E9Q5F6;E9QNP0;Q5SX22;P62984;P62983;P0CG49;P0CG50;J3QK04	3;3;3;3;3;3;3;3;3;2;1	3;3;3;3;3;3;3;3;3;2;1	3;3;3;3;3;3;3;3;3;2;1	Ubiquitin-60S ribosomal protein L40;Ubiquitin;60S ribosomal protein L40;Ubiquitin-40S ribosomal protein S27a;Ubiquitin;40S ribosomal protein S27a;Polyubiquitin-B;Ubiquitin;Polyubiquitin-C;Ubiquitin;Ubiquitin-related 1;Ubiquitin-related 2	Uba52;Kxd1;Ubc;Ubb;Rps27a;Gm7808	tr|E9Q9J0|E9Q9J0_MOUSE Ubiquitin-60S ribosomal protein L40 (Fragment) OS=Mus musculus GN=Uba52 PE=1 SV=1;tr|E9Q4P0|E9Q4P0_MOUSE KxDL motif-containing protein 1 (Fragment) OS=Mus musculus GN=Kxd1 PE=4 SV=1;tr|E9Q5F6|E9Q5F6_MOUSE Polyubiquitin-C (Fragment) O	33943000	13357000	241500000	32946000	24037000	5946200	33943000	24037000	11	3	3	3	3	3	3	3	3	3	3	3	3	3	3	3	3	3	3	3	3	3	35.4	35.4	35.4	10.914	96	96;193;201;232;236;128;156;305;734;128;122	0	53.365	35.4	35.4	35.4	35.4
E9Q557;E9PZW0	E9Q557;E9PZW0	24;19	24;19	24;19	Desmoplakin	Dsp	sp|E9Q557|DESP_MOUSE Desmoplakin OS=Mus musculus GN=Dsp PE=1 SV=1;tr|E9PZW0|E9PZW0_MOUSE Desmoplakin OS=Mus musculus GN=Dsp PE=1 SV=1	62049000	5922600	7496500	20209000	19255000	17018000	7496500	19255000	2	24	24	24	24	16	8	22	21	22	24	16	8	22	21	22	24	16	8	22	21	22	7.6	7.6	7.6	332.91	2883	2883;2284	0	161.08	7.6	5	2.5	6.6
E9QAZ2;Q9CZM2;B8JKK2	E9QAZ2;Q9CZM2	11;11;5	11;11;5	11;11;5	Ribosomal protein L15;60S ribosomal protein L15	Gm10020;Rpl15	tr|E9QAZ2|E9QAZ2_MOUSE Ribosomal protein L15 OS=Mus musculus GN=Gm10020 PE=3 SV=1;sp|Q9CZM2|RL15_MOUSE 60S ribosomal protein L15 OS=Mus musculus GN=Rpl15 PE=2 SV=4	123880000	94215000	162830000	107840000	113020000	34326000	123880000	107840000	3	11	11	11	10	11	9	11	10	10	10	11	9	11	10	10	10	11	9	11	10	10	40.7	40.7	40.7	24.077	204	204;204;107	0	82.809	40.2	40.7	40.2	40.7
Q9CPN7;F6R7E8	Q9CPN7;F6R7E8	1;1	1;1	1;1		1810009J06Rik;Gm2663	tr|Q9CPN7|Q9CPN7_MOUSE Protein 1810009J06Rik OS=Mus musculus GN=1810009J06Rik PE=2 SV=1;tr|F6R7E8|F6R7E8_MOUSE Protein Gm2663 OS=Mus musculus GN=Gm2663 PE=3 SV=1	21691000	12914000	4337400	6297100	3330500	5236100	12914000	5236100	2	1	1	1	1	1	1	1	1	1	1	1	1	1	1	1	1	1	1	1	1	1	8.1	8.1	8.1	26.503	247	247;247	0	7.073	8.1	8.1	8.1	8.1
F6SVV1;P62082	F6SVV1;P62082	4;4	4;4	4;4	40S ribosomal protein S7	Gm9493;Rps7	tr|F6SVV1|F6SVV1_MOUSE Protein Gm9493 OS=Mus musculus GN=Gm9493 PE=4 SV=1;sp|P62082|RS7_MOUSE 40S ribosomal protein S7 OS=Mus musculus GN=Rps7 PE=2 SV=1	438040	85052	71635000	408580	333360	641830	438040	408580	2	4	4	4	1	1	4	1	2	2	1	1	4	1	2	2	1	1	4	1	2	2	17.7	17.7	17.7	21.882	192	192;194	0	25.309	4.2	4.2	17.7	4.2
G5E919;F7CDT0;F6WMC0;P61082	G5E919;F7CDT0;F6WMC0;P61082	1;1;1;1	1;1;1;1	1;1;1;1	NEDD8-conjugating enzyme Ubc12	Ube2m	tr|G5E919|G5E919_MOUSE NEDD8-conjugating enzyme Ubc12 OS=Mus musculus GN=Ube2m PE=3 SV=1;tr|F7CDT0|F7CDT0_MOUSE NEDD8-conjugating enzyme Ubc12 (Fragment) OS=Mus musculus GN=Ube2m PE=3 SV=1;tr|F6WMC0|F6WMC0_MOUSE NEDD8-conjugating enzyme Ubc12 (Fragment) OS	493710	340170	10320000	612040	464870	223440	493710	464870	4	1	1	1	1	1	1	1	1	1	1	1	1	1	1	1	1	1	1	1	1	1	11.6	11.6	11.6	10.102	86	86;171;172;183	0	8.525	11.6	11.6	11.6	11.6
F6YVP7;P62270;S4R1N6	F6YVP7;P62270;S4R1N6	9;9;7	9;9;7	9;9;7	40S ribosomal protein S18	Gm10260;Rps18	tr|F6YVP7|F6YVP7_MOUSE Uncharacterized protein OS=Mus musculus GN=Gm10260 PE=3 SV=2;sp|P62270|RS18_MOUSE 40S ribosomal protein S18 OS=Mus musculus GN=Rps18 PE=1 SV=3;tr|S4R1N6|S4R1N6_MOUSE 40S ribosomal protein S18 OS=Mus musculus GN=Rps18 PE=3 SV=1	495990	100870	200260000	1040700	128180	1134000	495990	1040700	3	9	9	9	2	1	9	4	1	4	2	1	9	4	1	4	2	1	9	4	1	4	53.3	53.3	53.3	17.671	152	152;152;107	0	68.271	9.9	7.2	53.3	25
F8WHQ1;Q62393-3;D3Z637;D3Z125;E9PUA7;D3Z7X7;Q62393-2;Q62393;D3Z2U2	F8WHQ1;Q62393-3;D3Z637;D3Z125;E9PUA7;D3Z7X7;Q62393-2;Q62393;D3Z2U2	4;4;3;3;3;3;3;3;2	4;4;3;3;3;3;3;3;2	4;4;3;3;3;3;3;3;2	Tumor protein D52	Tpd52	tr|F8WHQ1|F8WHQ1_MOUSE Tumor protein D52 OS=Mus musculus GN=Tpd52 PE=4 SV=1;sp|Q62393-3|TPD52_MOUSE Isoform 3 of Tumor protein D52 OS=Mus musculus GN=Tpd52;tr|D3Z637|D3Z637_MOUSE MCG10134, isoform CRA_c OS=Mus musculus GN=Tpd52 PE=4 SV=1;tr|D3Z125|D3Z125_M	5664900	700400	2271300	3400600	722620	159310	2271300	722620	9	4	4	4	3	3	1	4	3	1	3	3	1	4	3	1	3	3	1	4	3	1	19.4	19.4	19.4	26.927	247	247;199;162;179;194;206;185;224;77	0	25.548	14.6	15.4	5.7	19.4
F8WI35;P84244;P84228;P68433;P02301;E0CZ27;E0CYN1;E0CYR7	F8WI35;P84244;P84228;P68433;P02301;E0CZ27	5;5;5;5;5;4;2;2	5;5;5;5;5;4;2;2	5;5;5;5;5;4;2;2	Histone H3;Histone H3.3;Histone H3.2;Histone H3.1;Histone H3.3C	H3f3a;Hist1h3b;Hist1h3a;H3f3c	tr|F8WI35|F8WI35_MOUSE Histone H3 OS=Mus musculus GN=H3f3a PE=3 SV=1;sp|P84244|H33_MOUSE Histone H3.3 OS=Mus musculus GN=H3f3a PE=1 SV=2;sp|P84228|H32_MOUSE Histone H3.2 OS=Mus musculus GN=Hist1h3b PE=1 SV=2;sp|P68433|H31_MOUSE Histone H3.1 OS=Mus musculus	20206000	16075000	2373400000	17011000	16880000	25579000	20206000	17011000	8	5	5	5	3	3	5	3	3	5	3	3	5	3	3	5	3	3	5	3	3	5	22.2	22.2	22.2	15.199	135	135;136;136;136;136;119;52;55	0	31.104	17	17	22.2	17
F8WIX8;Q64523;Q6GSS7;Q8R1M2;Q8CGP4;Q8CGP6;Q8CGP7;Q8CGP5;Q8BFU2;P22752;P27661;G3UWL7	F8WIX8;Q64523;Q6GSS7;Q8R1M2;Q8CGP4;Q8CGP6;Q8CGP7;Q8CGP5;Q8BFU2;P22752;P27661	4;4;4;3;2;2;2;2;2;2;2;1	4;4;4;3;2;2;2;2;2;2;2;1	1;1;1;0;0;0;0;0;0;0;0;0	Histone H2A;Histone H2A type 2-C;Histone H2A type 2-A;Histone H2A.J;Histone H2A type 1-H;Histone H2A type 1-K;Histone H2A type 1-F;Histone H2A type 3;Histone H2A type 1;Histone H2AX	Hist1h2al;Hist2h2ac;Hist2h2aa1;H2afj;Hist1h2aa;Hist1h2ah;Hist1h2ak;Hist1h2af;Hist3h2a;Hist1h2ab;H2afx	tr|F8WIX8|F8WIX8_MOUSE Histone H2A OS=Mus musculus GN=Hist1h2al PE=3 SV=1;sp|Q64523|H2A2C_MOUSE Histone H2A type 2-C OS=Mus musculus GN=Hist2h2ac PE=1 SV=3;sp|Q6GSS7|H2A2A_MOUSE Histone H2A type 2-A OS=Mus musculus GN=Hist2h2aa1 PE=1 SV=3;sp|Q8R1M2|H2AJ_MO	10087000	6743000	1016900000	7633500	6395200	15395000	10087000	7633500	12	4	4	1	2	2	4	2	2	2	2	2	4	2	2	2	0	0	1	0	0	0	27.2	27.2	8.8	13.607	125	125;129;130;129;129;128;130;130;130;130;143;87	0	24.424	12.8	12.8	27.2	12.8
G3UX26;Q60930;D3YZT5	G3UX26;Q60930	4;4;1	4;4;1	4;4;1	Voltage-dependent anion-selective channel protein 2	Vdac2	tr|G3UX26|G3UX26_MOUSE Voltage-dependent anion-selective channel protein 2 (Fragment) OS=Mus musculus GN=Vdac2 PE=1 SV=1;sp|Q60930|VDAC2_MOUSE Voltage-dependent anion-selective channel protein 2 OS=Mus musculus GN=Vdac2 PE=1 SV=2	876810	320350	55369000	639620	210060	446760	876810	446760	3	4	4	4	3	1	4	2	1	2	3	1	4	2	1	2	3	1	4	2	1	2	19.4	19.4	19.4	30.446	283	283;295;201	0	33.379	12.4	3.5	19.4	7.8
G3UXX3;Q91XH5;Q64105;G3UZ79	G3UXX3;Q91XH5;Q64105	12;12;11;5	12;12;11;5	12;12;11;5	Sepiapterin reductase	Spr	tr|G3UXX3|G3UXX3_MOUSE Sepiapterin reductase OS=Mus musculus GN=Spr PE=4 SV=1;tr|Q91XH5|Q91XH5_MOUSE Sepiapterin reductase OS=Mus musculus GN=Spr PE=2 SV=1;sp|Q64105|SPRE_MOUSE Sepiapterin reductase OS=Mus musculus GN=Spr PE=1 SV=1	10506000	3242700	225650	57673000	5894100	1751900	3242700	5894100	4	12	12	12	10	7	1	12	7	7	10	7	1	12	7	7	10	7	1	12	7	7	66.7	66.7	66.7	23.357	219	219;262;261;126	0	99.831	59.4	42.5	4.6	66.7
G3X9C2	G3X9C2	1	1	1	F-box only protein 50	Nccrp1	sp|G3X9C2|FBX50_MOUSE F-box only protein 50 OS=Mus musculus GN=Nccrp1 PE=2 SV=2	501580	61352	443340	288810	42822	142580	443340	142580	1	1	1	1	1	1	1	1	1	1	1	1	1	1	1	1	1	1	1	1	1	1	4.1	4.1	4.1	30.407	266	266	0.0032733	6.1469	4.1	4.1	4.1	4.1
G3XA10;Q8VEK3	G3XA10;Q8VEK3	9;9	9;9	9;9	Heterogeneous nuclear ribonucleoprotein U	Gm28062;Hnrnpu	tr|G3XA10|G3XA10_MOUSE Heterogeneous nuclear ribonucleoprotein U, isoform CRA_b OS=Mus musculus GN=Hnrnpu PE=1 SV=1;sp|Q8VEK3|HNRPU_MOUSE Heterogeneous nuclear ribonucleoprotein U OS=Mus musculus GN=Hnrnpu PE=1 SV=1	342250	600010	147660000	1306600	481820	1611000	600010	1306600	2	9	9	9	2	4	9	4	2	6	2	4	9	4	2	6	2	4	9	4	2	6	12.5	12.5	12.5	86.805	793	793;800	0	84.31	2.4	4.7	12.5	4.7
I7HLV2;Q6ZWV3;P86048;B7FAU6	I7HLV2;Q6ZWV3;P86048	10;10;8;2	10;10;8;2	10;10;8;2	60S ribosomal protein L10;60S ribosomal protein L10-like	Rpl10;Rpl10l	tr|I7HLV2|I7HLV2_MOUSE 60S ribosomal protein L10 (Fragment) OS=Mus musculus GN=Rpl10 PE=4 SV=1;sp|Q6ZWV3|RL10_MOUSE 60S ribosomal protein L10 OS=Mus musculus GN=Rpl10 PE=1 SV=3;sp|P86048|RL10L_MOUSE 60S ribosomal protein L10-like OS=Mus musculus GN=Rpl10l	102240000	44602000	70898000	76956000	43486000	11966000	70898000	43486000	4	10	10	10	10	10	8	10	9	9	10	10	8	10	9	9	10	10	8	10	9	9	35.8	35.8	35.8	23.072	201	201;214;214;167	0	87.426	35.8	35.8	31.3	35.8
O08547;E9Q6R3;D6RES2	O08547;E9Q6R3	9;7;1	9;7;1	9;7;1	Vesicle-trafficking protein SEC22b	Sec22b	sp|O08547|SC22B_MOUSE Vesicle-trafficking protein SEC22b OS=Mus musculus GN=Sec22b PE=1 SV=3;tr|E9Q6R3|E9Q6R3_MOUSE Vesicle-trafficking protein SEC22b OS=Mus musculus GN=Sec22b PE=1 SV=1	195890000	59955000	56672000	181570000	67929000	19698000	59955000	67929000	3	9	9	9	9	8	8	9	8	8	9	8	8	9	8	8	9	8	8	9	8	8	47.4	47.4	47.4	24.74	215	215;166;42	0	135.65	47.4	38.6	38.6	47.4
O08807;B1AZS9	O08807;B1AZS9	14;9	14;9	13;8	Peroxiredoxin-4	Prdx4	sp|O08807|PRDX4_MOUSE Peroxiredoxin-4 OS=Mus musculus GN=Prdx4 PE=1 SV=1;tr|B1AZS9|B1AZS9_MOUSE Peroxiredoxin-4 (Fragment) OS=Mus musculus GN=Prdx4 PE=4 SV=1	337920000	108510000	421520000	709260000	330280000	123680000	337920000	330280000	2	14	14	13	14	11	8	13	14	11	14	11	8	13	14	11	13	10	7	12	13	10	53.6	53.6	50.7	31.052	274	274;229	0	179.63	53.6	52.6	30.3	53.6
O35129;F6QPR1;F6Q8V7	O35129;F6QPR1;F6Q8V7	10;6;5	10;6;5	10;6;5	Prohibitin-2	Phb2	sp|O35129|PHB2_MOUSE Prohibitin-2 OS=Mus musculus GN=Phb2 PE=1 SV=1;tr|F6QPR1|F6QPR1_MOUSE Prohibitin-2 (Fragment) OS=Mus musculus GN=Phb2 PE=1 SV=1;tr|F6Q8V7|F6Q8V7_MOUSE Prohibitin-2 (Fragment) OS=Mus musculus GN=Phb2 PE=1 SV=1	1401900	516400	87163000	1437400	656570	453370	1401900	656570	3	10	10	10	5	3	10	6	5	3	5	3	10	6	5	3	5	3	10	6	5	3	38.8	38.8	38.8	33.296	299	299;157;104	0	79.85	18.4	12.7	38.8	22.1
Q8C2Q7;O35737;P70333;J3QPH6	Q8C2Q7;O35737;P70333	7;7;5;2	7;7;5;2	6;6;4;2	Heterogeneous nuclear ribonucleoprotein H;Heterogeneous nuclear ribonucleoprotein H, N-terminally processed;Heterogeneous nuclear ribonucleoprotein H2	Hnrnph1;Hnrnph2	tr|Q8C2Q7|Q8C2Q7_MOUSE Heterogeneous nuclear ribonucleoprotein H OS=Mus musculus GN=Hnrnph1 PE=2 SV=1;sp|O35737|HNRH1_MOUSE Heterogeneous nuclear ribonucleoprotein H OS=Mus musculus GN=Hnrnph1 PE=1 SV=3;sp|P70333|HNRH2_MOUSE Heterogeneous nuclear ribonucle	948470	594580	81170000	72125	708570	1106500	948470	708570	4	7	7	6	2	1	7	1	1	3	2	1	7	1	1	3	1	0	6	0	0	2	19.1	19.1	16.9	51.217	472	472;449;449;171	0	94.834	5.7	2.1	19.1	2.1
O55135;A6PWZ2;D6RG53;D6RJJ3;B1AZQ4	O55135	7;2;1;1;1	7;2;1;1;1	7;2;1;1;1	Eukaryotic translation initiation factor 6	Eif6	sp|O55135|IF6_MOUSE Eukaryotic translation initiation factor 6 OS=Mus musculus GN=Eif6 PE=1 SV=2	64848000	16620000	3032600	52205000	18914000	5311200	16620000	18914000	5	7	7	7	7	6	3	6	6	5	7	6	3	6	6	5	7	6	3	6	6	5	37.6	37.6	37.6	26.511	245	245;58;59;71;81	0	101.86	37.6	27.3	17.6	27.3
O70456	O70456	6	3	3	14-3-3 protein sigma	Sfn	sp|O70456|1433S_MOUSE 14-3-3 protein sigma OS=Mus musculus GN=Sfn PE=1 SV=2	877620	1737200	106050000	3125700	1379900	1979700	1737200	1979700	1	6	3	3	3	5	6	3	3	4	2	2	3	2	1	2	2	2	3	2	1	2	21	12.1	12.1	27.706	248	248	0	17.718	11.7	17.3	21	11.7
O88569;O88569-3;O88569-2	O88569;O88569-3;O88569-2	15;14;14	15;14;14	14;13;13	Heterogeneous nuclear ribonucleoproteins A2/B1	Hnrnpa2b1	sp|O88569|ROA2_MOUSE Heterogeneous nuclear ribonucleoproteins A2/B1 OS=Mus musculus GN=Hnrnpa2b1 PE=1 SV=2;sp|O88569-3|ROA2_MOUSE Isoform 3 of Heterogeneous nuclear ribonucleoproteins A2/B1 OS=Mus musculus GN=Hnrnpa2b1;sp|O88569-2|ROA2_MOUSE Isoform 2 of H	15045000	48447000	379900000	17679000	42033000	24949000	48447000	24949000	3	15	15	14	13	14	14	12	15	15	13	14	14	12	15	15	12	13	13	11	14	14	47.6	47.6	45	37.402	353	353;301;341	0	114.24	42.5	43.1	43.1	40.2
P00493	P00493	10	10	10	Hypoxanthine-guanine phosphoribosyltransferase	Hprt1	sp|P00493|HPRT_MOUSE Hypoxanthine-guanine phosphoribosyltransferase OS=Mus musculus GN=Hprt1 PE=1 SV=3	193790000	39652000	8012400	141490000	44471000	9786700	39652000	44471000	1	10	10	10	10	9	4	10	10	8	10	9	4	10	10	8	10	9	4	10	10	8	54.6	54.6	54.6	24.57	218	218	0	81.208	54.6	51.4	21.1	54.6
P01863;P01865;A0A075B5P3;F6TQW2;P01864	P01863;P01865	5;5;1;1;1	5;5;1;1;1	5;5;1;1;1	Ig gamma-2A chain C region, A allele;Ig gamma-2A chain C region, membrane-bound form	Ighg;Igh-1a	sp|P01863|GCAA_MOUSE Ig gamma-2A chain C region, A allele OS=Mus musculus GN=Ighg PE=1 SV=1;sp|P01865|GCAM_MOUSE Ig gamma-2A chain C region, membrane-bound form OS=Mus musculus GN=Igh-1a PE=1 SV=3	19804000	12075000	3228000	11123000	15120000	2807700	12075000	11123000	5	5	5	5	5	5	2	4	5	4	5	5	2	4	5	4	5	5	2	4	5	4	20.9	20.9	20.9	36.389	330	330;398;336;403;335	0	50.029	20.9	20.9	10	20.9
P04925	P04925	7	7	7	Major prion protein	Prnp	sp|P04925|PRIO_MOUSE Major prion protein OS=Mus musculus GN=Prnp PE=1 SV=2	14070000	5303100	372870	14184000	4355200	1000100	5303100	4355200	1	7	7	7	7	7	1	7	7	5	7	7	1	7	7	5	7	7	1	7	7	5	26	26	26	27.977	254	254	0	53.431	26	26	3.9	26
P68373;P68369;P05213;P05214;Q9JJZ2;A0A087WRB4;A0A087WQS4;A0A087WSB0;A0A087WSL5;Q3UX10	P68373;P68369;P05213;P05214	13;13;13;11;6;3;3;1;1;1	13;13;13;11;6;3;3;1;1;1	4;4;4;2;0;0;0;0;0;0	Tubulin alpha-1C chain;Tubulin alpha-1A chain;Tubulin alpha-1B chain;Tubulin alpha-3 chain	Tuba1c;Tuba1a;Tuba1b;Tuba3a	sp|P68373|TBA1C_MOUSE Tubulin alpha-1C chain OS=Mus musculus GN=Tuba1c PE=1 SV=1;sp|P68369|TBA1A_MOUSE Tubulin alpha-1A chain OS=Mus musculus GN=Tuba1a PE=1 SV=1;sp|P05213|TBA1B_MOUSE Tubulin alpha-1B chain OS=Mus musculus GN=Tuba1b PE=1 SV=2;sp|P05214|TBA	1682700	1734900	749480000	2276500	694880	6448900	1734900	2276500	10	13	13	4	5	7	13	7	3	10	5	7	13	7	3	10	2	3	4	3	1	4	36.7	36.7	12	49.909	449	449;451;451;450;449;100;125;81;89;446	0	121.65	16.5	20.7	36.7	20.3
P07356;B0V2N7;B0V2N5;B0V2N8	P07356;B0V2N7;B0V2N5;B0V2N8	9;8;7;6	9;8;7;6	9;8;7;6	Annexin A2;Annexin	Anxa2	sp|P07356|ANXA2_MOUSE Annexin A2 OS=Mus musculus GN=Anxa2 PE=1 SV=2;tr|B0V2N7|B0V2N7_MOUSE Annexin (Fragment) OS=Mus musculus GN=Anxa2 PE=1 SV=1;tr|B0V2N5|B0V2N5_MOUSE Annexin (Fragment) OS=Mus musculus GN=Anxa2 PE=1 SV=1;tr|B0V2N8|B0V2N8_MOUSE Annexin (Fr	8387500	1638700	129350000	2978800	1108600	1941200	8387500	1941200	4	9	9	9	5	4	9	5	3	5	5	4	9	5	3	5	5	4	9	5	3	5	24.2	24.2	24.2	38.676	339	339;196;272;176	0	137.58	18.9	12.1	24.2	18.9
P08113;F7C312	P08113;F7C312	17;10	15;10	15;10	Endoplasmin	Hsp90b1	sp|P08113|ENPL_MOUSE Endoplasmin OS=Mus musculus GN=Hsp90b1 PE=1 SV=2;tr|F7C312|F7C312_MOUSE Endoplasmin (Fragment) OS=Mus musculus GN=Hsp90b1 PE=1 SV=1	1165600	748270	177910000	588230	306540	1420400	1165600	588230	2	17	15	15	4	5	17	3	3	7	3	4	15	2	2	6	3	4	15	2	2	6	20.8	19.1	19.1	92.475	802	802;373	0	107.77	4.9	6	20.8	3.9
P08249	P08249	3	3	3	Malate dehydrogenase, mitochondrial	Mdh2	sp|P08249|MDHM_MOUSE Malate dehydrogenase, mitochondrial OS=Mus musculus GN=Mdh2 PE=1 SV=3	621430	202830	19661000	784440	211690	189340	621430	211690	1	3	3	3	1	1	3	2	1	1	1	1	3	2	1	1	1	1	3	2	1	1	10.9	10.9	10.9	35.611	338	338	0	29.499	3.3	3.3	10.9	6.2
P10126;P62631;D3Z3I8;D3YZ68	P10126;P62631;D3Z3I8;D3YZ68	9;7;5;5	9;7;5;5	9;7;5;5	Elongation factor 1-alpha 1;Elongation factor 1-alpha 2	Eef1a1;Eef1a2	sp|P10126|EF1A1_MOUSE Elongation factor 1-alpha 1 OS=Mus musculus GN=Eef1a1 PE=1 SV=3;sp|P62631|EF1A2_MOUSE Elongation factor 1-alpha 2 OS=Mus musculus GN=Eef1a2 PE=1 SV=1;tr|D3Z3I8|D3Z3I8_MOUSE Elongation factor 1-alpha 1 (Fragment) OS=Mus musculus GN=Eef	17690000	5751000	955410000	14950000	5636200	14762000	17690000	14762000	4	9	9	9	7	7	9	8	5	9	7	7	9	8	5	9	7	7	9	8	5	9	23.6	23.6	23.6	50.113	462	462;463;186;249	0	82.838	20.1	20.1	23.6	21.9
P10639	P10639	1	1	1	Thioredoxin	Txn	sp|P10639|THIO_MOUSE Thioredoxin OS=Mus musculus GN=Txn PE=1 SV=3	2069100	288350	41107000	736090	566400	422370	2069100	566400	1	1	1	1	1	1	1	1	1	1	1	1	1	1	1	1	1	1	1	1	1	1	8.6	8.6	8.6	11.675	105	105	0	6.4056	8.6	8.6	8.6	8.6
P10649;A2AE89;F6WHQ7;D3YVP6;E9QAC8;D3YVP5;Q80W21;D3YX76;P19639;P15626;F6Y363;D3YZ29;D3YVP8;D3YVP9;A2AE91;J3QQ61;Q8R5I6;G5E8M7;O35660	P10649;A2AE89;F6WHQ7	11;10;6;3;3;3;3;2;2;2;1;1;1;1;1;1;1;1;1	10;9;5;2;2;2;2;1;2;1;0;0;1;1;0;0;0;1;1	10;9;5;2;2;2;2;1;2;1;0;0;1;1;0;0;0;1;1	Glutathione S-transferase Mu 1	Gstm1	sp|P10649|GSTM1_MOUSE Glutathione S-transferase Mu 1 OS=Mus musculus GN=Gstm1 PE=1 SV=2;tr|A2AE89|A2AE89_MOUSE Glutathione S-transferase Mu 1 (Fragment) OS=Mus musculus GN=Gstm1 PE=3 SV=1;tr|F6WHQ7|F6WHQ7_MOUSE Glutathione S-transferase Mu 1 (Fragment) OS=	22579000	7217800	892330	25036000	7538900	2337700	7217800	7538900	19	11	10	10	11	9	3	11	6	8	10	8	2	10	5	7	10	8	2	10	5	7	43.6	39.4	39.4	25.97	218	218;201;194;181;193;214;218;184;218;218;85;119;123;154;184;196;218;232;218	0	79.734	43.6	32.1	11	43.6
Q6ZWY9;Q64525;Q64478;P10854;Q8CBB6;Q8CGP2;Q8CGP1;Q64475;P10853;Q8CGP2-2;P70696;G3X9D5	Q6ZWY9;Q64525;Q64478;P10854;Q8CBB6;Q8CGP2;Q8CGP1;Q64475;P10853;Q8CGP2-2;P70696	9;9;9;9;8;8;8;8;8;8;5;4	9;9;9;9;8;8;8;8;8;8;5;4	4;4;4;4;3;3;3;3;3;3;1;2	Histone H2B type 1-C/E/G;Histone H2B type 2-B;Histone H2B type 1-H;Histone H2B type 1-M;Histone H2B;Histone H2B type 1-P;Histone H2B type 1-K;Histone H2B type 1-B;Histone H2B type 1-F/J/L;Histone H2B type 1-A	Hist1h2bc;Hist2h2bb;Hist1h2bh;Hist1h2bm;Hist1h2br;Hist1h2bp;Hist1h2bk;Hist1h2bb;Hist1h2bf;Hist1h2ba	sp|Q6ZWY9|H2B1C_MOUSE Histone H2B type 1-C/E/G OS=Mus musculus GN=Hist1h2bc PE=1 SV=3;sp|Q64525|H2B2B_MOUSE Histone H2B type 2-B OS=Mus musculus GN=Hist2h2bb PE=1 SV=3;sp|Q64478|H2B1H_MOUSE Histone H2B type 1-H OS=Mus musculus GN=Hist1h2bh PE=1 SV=3;sp|P10	6178900	7043200	1308600000	4732100	6640300	14344000	7043200	6640300	12	9	9	4	3	4	9	4	3	6	3	4	9	4	3	6	0	1	4	1	0	3	61.9	61.9	19	13.906	126	126;126;126;126;134;126;126;126;126;138;127;120	0	70.892	27.8	35.7	61.9	34.9
P11499;E9Q3D6;E9Q0C3;E9PX27;D3Z1R1	P11499	28;9;6;5;4	28;9;6;5;4	17;6;6;1;0	Heat shock protein HSP 90-beta	Hsp90ab1	sp|P11499|HS90B_MOUSE Heat shock protein HSP 90-beta OS=Mus musculus GN=Hsp90ab1 PE=1 SV=3	4823000	993410	1584600000	3561300	1973700	14726000	4823000	3561300	5	28	28	17	8	4	28	10	8	20	8	4	28	10	8	20	3	0	17	5	3	11	36.9	36.9	21.5	83.28	724	724;189;161;112;76	0	275.63	13.4	6.2	36.9	15.5
P12970;F6VBB8;V9GX35;F6SSI5	P12970	7;3;2;2	7;3;2;2	7;3;2;2	60S ribosomal protein L7a	Rpl7a	sp|P12970|RL7A_MOUSE 60S ribosomal protein L7a OS=Mus musculus GN=Rpl7a PE=2 SV=2	486340	179710	144110000	239930	225440	885830	486340	239930	4	7	7	7	2	1	7	1	1	4	2	1	7	1	1	4	2	1	7	1	1	4	23.7	23.7	23.7	29.976	266	266;267;225;269	0	47.201	9	3	23.7	4.9
P14869;D3YVM5;S4R1N1;E9Q070	P14869;D3YVM5;S4R1N1;E9Q070	5;4;4;4	5;4;4;4	5;4;4;4	60S acidic ribosomal protein P0	Rplp0;Gm8730	sp|P14869|RLA0_MOUSE 60S acidic ribosomal protein P0 OS=Mus musculus GN=Rplp0 PE=1 SV=3;tr|D3YVM5|D3YVM5_MOUSE 60S acidic ribosomal protein P0 (Fragment) OS=Mus musculus GN=Rplp0 PE=3 SV=1;tr|S4R1N1|S4R1N1_MOUSE 60S acidic ribosomal protein P0 (Fragment) O	1407500	739550	51863000	1383700	521040	1096200	1407500	1096200	4	5	5	5	3	3	5	2	2	3	3	3	5	2	2	3	3	3	5	2	2	3	15.1	15.1	15.1	34.216	317	317;145;221;317	0	46.038	9.8	8.8	15.1	6.6
P15864;P43277;P43275;I7HFT9;Q07133	P15864;P43277	5;5;2;1;1	5;5;2;1;1	2;2;0;0;0	Histone H1.2;Histone H1.3	Hist1h1c;Hist1h1d	sp|P15864|H12_MOUSE Histone H1.2 OS=Mus musculus GN=Hist1h1c PE=1 SV=2;sp|P43277|H13_MOUSE Histone H1.3 OS=Mus musculus GN=Hist1h1d PE=1 SV=2	711660	405600	241390000	612090	402700	840460	711660	612090	5	5	5	2	1	1	5	2	1	2	1	1	5	2	1	2	1	1	2	1	1	1	16	16	6.1	21.266	212	212;221;213;209;208	0	41.444	5.7	5.7	16	10.8
P16125;D3Z7F0	P16125;D3Z7F0	8;5	8;5	7;4	L-lactate dehydrogenase B chain;L-lactate dehydrogenase	Ldhb	sp|P16125|LDHB_MOUSE L-lactate dehydrogenase B chain OS=Mus musculus GN=Ldhb PE=1 SV=2;tr|D3Z7F0|D3Z7F0_MOUSE L-lactate dehydrogenase (Fragment) OS=Mus musculus GN=Ldhb PE=3 SV=1	1238300	401840	283870000	1148200	440280	1370600	1238300	1148200	2	8	8	7	2	2	8	2	2	5	2	2	8	2	2	5	1	1	7	1	1	4	26.9	26.9	23.4	36.572	334	334;198	0	61.947	6.6	6.6	26.9	6.6
S4R1W1;P16858;S4R257;D3YYI5;D3Z0Z9;S4R1N5;V9GXK0;V9GX06;S4R2G5;Q64467	S4R1W1;P16858;S4R257;D3YYI5	7;7;6;6;3;1;1;1;1;1	7;7;6;6;3;1;1;1;1;1	7;7;6;6;3;1;1;1;1;1	Glyceraldehyde-3-phosphate dehydrogenase	Gm3839;Gapdh;Gm7293	tr|S4R1W1|S4R1W1_MOUSE Glyceraldehyde-3-phosphate dehydrogenase OS=Mus musculus GN=Gm3839 PE=3 SV=1;sp|P16858|G3P_MOUSE Glyceraldehyde-3-phosphate dehydrogenase OS=Mus musculus GN=Gapdh PE=1 SV=2;tr|S4R257|S4R257_MOUSE Glyceraldehyde-3-phosphate dehydrogen	8017000	1538400	640060000	2243800	2114600	5070200	8017000	2243800	10	7	7	7	3	2	7	2	3	3	3	2	7	2	3	3	3	2	7	2	3	3	20.1	20.1	20.1	35.812	333	333;333;280;336;337;57;151;183;440;440	0	45.328	10.8	8.4	20.1	8.4
P17182;Q6PHC1;B0QZL1;B1ARR7;D3Z2S4;P17183;B1ARR6;D3YVD3;Q5SX59;D3Z6E4;P21550;Q5SX61;Q5SX60	P17182;Q6PHC1;B0QZL1	9;7;6;3;3;3;2;2;2;2;2;1;1	9;7;6;3;3;3;2;2;2;2;2;1;1	9;7;6;3;3;3;2;2;2;2;2;1;1	Alpha-enolase;Enolase	Eno1	sp|P17182|ENOA_MOUSE Alpha-enolase OS=Mus musculus GN=Eno1 PE=1 SV=3;tr|Q6PHC1|Q6PHC1_MOUSE Alpha-enolase OS=Mus musculus GN=Eno1 PE=1 SV=1;tr|B0QZL1|B0QZL1_MOUSE Enolase (Fragment) OS=Mus musculus GN=Eno1 PE=1 SV=1	3113300	385760	369000000	1442300	359790	4696700	3113300	1442300	13	9	9	9	4	1	8	3	1	4	4	1	8	3	1	4	4	1	8	3	1	4	29	29	29	47.14	434	434;366;221;119;162;434;67;122;196;315;434;70;80	0	135.84	11.8	3	25.6	7.6
P17742;F8VPN3;V9GXC1;V9GX31	P17742;F8VPN3	8;4;2;2	8;4;2;2	8;4;2;2	Peptidyl-prolyl cis-trans isomerase A;Peptidyl-prolyl cis-trans isomerase A, N-terminally processed;Peptidyl-prolyl cis-trans isomerase	Ppia;Gm5160	sp|P17742|PPIA_MOUSE Peptidyl-prolyl cis-trans isomerase A OS=Mus musculus GN=Ppia PE=1 SV=2;tr|F8VPN3|F8VPN3_MOUSE Peptidyl-prolyl cis-trans isomerase OS=Mus musculus GN=Gm5160 PE=3 SV=2	1457600	2335500	920840000	1410100	1167900	9346800	2335500	1410100	4	8	8	8	1	4	8	2	2	7	1	4	8	2	2	7	1	4	8	2	2	7	37.2	37.2	37.2	17.971	164	164;147;77;77	0	58.458	5.5	25	37.2	9.8
P17751;H7BXC3	P17751;H7BXC3	12;8	12;8	12;8	Triosephosphate isomerase	Tpi1	sp|P17751|TPIS_MOUSE Triosephosphate isomerase OS=Mus musculus GN=Tpi1 PE=1 SV=4;tr|H7BXC3|H7BXC3_MOUSE Triosephosphate isomerase OS=Mus musculus GN=Tpi1 PE=1 SV=1	467060000	77059000	72988000	447530000	86539000	21705000	77059000	86539000	2	12	12	12	12	10	9	12	11	10	12	10	9	12	11	10	12	10	9	12	11	10	46.8	46.8	46.8	32.191	299	299;167	0	136.14	46.8	35.5	32.1	46.8
Q61696;P17879	Q61696;P17879	14;14	9;9	5;5	Heat shock 70 kDa protein 1A;Heat shock 70 kDa protein 1B	Hspa1a;Hspa1b	sp|Q61696|HS71A_MOUSE Heat shock 70 kDa protein 1A OS=Mus musculus GN=Hspa1a PE=1 SV=2;sp|P17879|HS71B_MOUSE Heat shock 70 kDa protein 1B OS=Mus musculus GN=Hspa1b PE=1 SV=3	2249200	486790	146900000	727440	731860	1341600	2249200	731860	2	14	9	5	5	4	14	4	4	8	3	3	9	3	3	6	0	1	5	0	0	2	25.4	16.5	9.2	70.078	641	641;642	0	81.549	8.7	6.2	25.4	7.3
P17897	P17897	1	1	1	Lysozyme C-1	Lyz1	sp|P17897|LYZ1_MOUSE Lysozyme C-1 OS=Mus musculus GN=Lyz1 PE=1 SV=1	1949200	2745100	973400	477450	129240	744430	1949200	477450	1	1	1	1	1	1	1	1	1	1	1	1	1	1	1	1	1	1	1	1	1	1	8.1	8.1	8.1	16.794	148	148	0	7.2959	8.1	8.1	8.1	8.1
P19157;P46425;Q8VC73;F6RWR5	P19157	5;2;1;1	5;2;1;1	5;2;1;1	Glutathione S-transferase P 1	Gstp1	sp|P19157|GSTP1_MOUSE Glutathione S-transferase P 1 OS=Mus musculus GN=Gstp1 PE=1 SV=2	10727000	5524100	3232100	240830	6296700	162970	5524100	240830	4	5	5	5	4	5	1	1	5	1	4	5	1	1	5	1	4	5	1	1	5	1	31.9	31.9	31.9	23.609	210	210;210;210;210	0	92.223	24.3	31.9	5.2	7.6
P19253;E9Q5A0;S4R281	P19253;E9Q5A0;S4R281	9;8;6	9;8;6	9;8;6	60S ribosomal protein L13a	Rpl13a	sp|P19253|RL13A_MOUSE 60S ribosomal protein L13a OS=Mus musculus GN=Rpl13a PE=1 SV=4;tr|E9Q5A0|E9Q5A0_MOUSE 60S ribosomal protein L13a OS=Mus musculus GN=Rpl13a PE=3 SV=1;tr|S4R281|S4R281_MOUSE 60S ribosomal protein L13a OS=Mus musculus GN=Rpl13a PE=3 SV=1	238200000	71247000	94670000	141320000	94803000	23484000	94670000	94803000	3	9	9	9	9	9	7	9	8	8	9	9	7	9	8	8	9	9	7	9	8	8	34.5	34.5	34.5	23.464	203	203;423;148	0	70.595	34.5	34.5	28.6	34.5
P20029	P20029	24	24	22	78 kDa glucose-regulated protein	Hspa5	sp|P20029|GRP78_MOUSE 78 kDa glucose-regulated protein OS=Mus musculus GN=Hspa5 PE=1 SV=3	11071000	5322800	597140000	10189000	7596300	6324400	11071000	7596300	1	24	24	22	11	9	24	11	9	14	11	9	24	11	9	14	9	8	22	9	7	12	38.2	38.2	36.5	72.421	655	655	0	205.36	22.3	15.9	38.2	22.7
P20152;P31001;G5E846;G3X981;P15331-3;P15331;P15331-2;A2AKJ2	P20152	26;5;4;4;4;4;4;3	23;3;2;2;2;2;2;3	22;2;2;2;2;2;2;3	Vimentin	Vim	sp|P20152|VIME_MOUSE Vimentin OS=Mus musculus GN=Vim PE=1 SV=3	379420	576640	609140000	300810	465980	2612000	576640	465980	8	26	23	22	4	6	26	5	6	14	2	4	23	2	3	11	2	4	22	2	3	11	45.9	42.5	40.6	53.687	466	466;469;475;507;461;475;507;102	0	180.45	7.5	11.2	45.9	7.5
P21107-2;D3Z2H9;D3Z6I8;E9Q7Q3;Q8K0Z5;E9Q5J9;P21107;D3YVR0	P21107-2;D3Z2H9;D3Z6I8;E9Q7Q3;Q8K0Z5;E9Q5J9	9;8;7;7;6;6;4;2	9;8;7;7;6;6;4;2	7;6;5;5;4;4;2;2	Tropomyosin alpha-3 chain	Tpm3;Tpm3-rs7	sp|P21107-2|TPM3_MOUSE Isoform 2 of Tropomyosin alpha-3 chain OS=Mus musculus GN=Tpm3;tr|D3Z2H9|D3Z2H9_MOUSE Uncharacterized protein OS=Mus musculus GN=Tpm3-rs7 PE=3 SV=1;tr|D3Z6I8|D3Z6I8_MOUSE Tropomyosin alpha-3 chain OS=Mus musculus GN=Tpm3 PE=3 SV=1;tr	1248900	558190	111930000	740390	218280	1613600	1248900	740390	8	9	9	7	3	1	9	2	1	1	3	1	9	2	1	1	1	0	7	0	0	0	33.1	33.1	26.2	29.02	248	248;248;247;248;284;285;285;71	0	71.887	11.7	4	33.1	6.9
P23116	P23116	2	2	2	Eukaryotic translation initiation factor 3 subunit A	Eif3a	sp|P23116|EIF3A_MOUSE Eukaryotic translation initiation factor 3 subunit A OS=Mus musculus GN=Eif3a PE=1 SV=5	50968000	218760	8663500	1431800	641560	452570	8663500	641560	1	2	2	2	1	1	1	1	1	1	1	1	1	1	1	1	1	1	1	1	1	1	1.3	1.3	1.3	161.93	1344	1344	0	10.918	0.7	0.7	0.6	0.7
P27048;P63163	P27048;P63163	6;6	6;6	6;6	Small nuclear ribonucleoprotein-associated protein B;Small nuclear ribonucleoprotein-associated protein N	Snrpb;Snrpn	sp|P27048|RSMB_MOUSE Small nuclear ribonucleoprotein-associated protein B OS=Mus musculus GN=Snrpb PE=1 SV=1;sp|P63163|RSMN_MOUSE Small nuclear ribonucleoprotein-associated protein N OS=Mus musculus GN=Snrpn PE=2 SV=1	29078000	2913200	21456000	29652000	2857300	1190600	21456000	2857300	2	6	6	6	5	4	3	6	3	3	5	4	3	6	3	3	5	4	3	6	3	3	25.1	25.1	25.1	23.656	231	231;240	0	37.228	19.5	16	13	25.1
Q3U9N4;P28798;H3BLC9;H3BJE0	Q3U9N4;P28798	3;3;1;1	3;3;1;1	3;3;1;1	Granulins;Acrogranin;Granulin-1;Granulin-2;Granulin-3;Granulin-4;Granulin-5;Granulin-6;Granulin-7	Grn	tr|Q3U9N4|Q3U9N4_MOUSE Granulins OS=Mus musculus GN=Grn PE=2 SV=1;sp|P28798|GRN_MOUSE Granulins OS=Mus musculus GN=Grn PE=1 SV=2	11931000	10472000	508500	8690900	4455500	2940600	10472000	4455500	4	3	3	3	1	3	1	3	3	3	1	3	1	3	3	3	1	3	1	3	3	3	7	7	7	65.018	602	602;589;214;247	0	23.656	2.7	7	2.7	7
P32848	P32848	3	3	3	Parvalbumin alpha	Pvalb	sp|P32848|PRVA_MOUSE Parvalbumin alpha OS=Mus musculus GN=Pvalb PE=1 SV=3	6479900	6278300	3007100	6714400	5729700	2969000	6278300	5729700	1	3	3	3	3	3	3	3	3	3	3	3	3	3	3	3	3	3	3	3	3	3	35.5	35.5	35.5	11.93	110	110	0	33.668	35.5	35.5	35.5	35.5
P34022;H7BX22	P34022;H7BX22	4;2	4;2	4;2	Ran-specific GTPase-activating protein	Ranbp1	sp|P34022|RANG_MOUSE Ran-specific GTPase-activating protein OS=Mus musculus GN=Ranbp1 PE=1 SV=2;tr|H7BX22|H7BX22_MOUSE Ran-specific GTPase-activating protein OS=Mus musculus GN=Ranbp1 PE=1 SV=1	11727000	2708200	10246000	57422000	5440200	1178600	10246000	5440200	2	4	4	4	4	2	1	4	3	1	4	2	1	4	3	1	4	2	1	4	3	1	31	31	31	23.596	203	203;153	0	39.766	31	10.8	5.4	31
Q8C266;P35278;A2A5F5;A2A5F6	Q8C266;P35278	6;6;2;1	4;4;0;0	4;4;0;0	Ras-related protein Rab-5C	Rab5c	tr|Q8C266|Q8C266_MOUSE Ras-related protein Rab-5C OS=Mus musculus GN=Rab5c PE=2 SV=1;sp|P35278|RAB5C_MOUSE Ras-related protein Rab-5C OS=Mus musculus GN=Rab5c PE=1 SV=2	10488000	1868300	5914100	3364600	1749800	173770	5914100	1749800	4	6	4	4	6	5	5	6	4	2	4	3	3	4	2	1	4	3	3	4	2	1	34.6	25.2	25.2	25.352	234	234;216;83;35	0	37.104	34.6	26.5	29.5	34.6
P35279-2;P35279;D3YV69;P61294;Q8BHD0	P35279-2;P35279;D3YV69;P61294	5;5;4;3;1	5;5;4;3;1	5;5;4;3;1	Ras-related protein Rab-6A;Ras-related protein Rab-6B	Rab6a;Rab6b	sp|P35279-2|RAB6A_MOUSE Isoform 2 of Ras-related protein Rab-6A OS=Mus musculus GN=Rab6a;sp|P35279|RAB6A_MOUSE Ras-related protein Rab-6A OS=Mus musculus GN=Rab6a PE=1 SV=4;tr|D3YV69|D3YV69_MOUSE Ras-related protein Rab-6A OS=Mus musculus GN=Rab6a PE=3 SV=	36247000	7924100	32390000	14236000	8725700	1240400	32390000	8725700	5	5	5	5	5	5	5	3	5	1	5	5	5	3	5	1	5	5	5	3	5	1	28.8	28.8	28.8	23.545	208	208;208;175;208;217	0	40.363	28.8	28.8	28.8	16.3
P35282	P35282	7	7	7	Ras-related protein Rab-21	Rab21	sp|P35282|RAB21_MOUSE Ras-related protein Rab-21 OS=Mus musculus GN=Rab21 PE=1 SV=4	15439000	5232800	4153800	45105000	7692800	2406300	5232800	7692800	1	7	7	7	6	7	2	7	6	5	6	7	2	7	6	5	6	7	2	7	6	5	37.4	37.4	37.4	24.106	222	222	0	76.082	36.9	37.4	13.5	37.4
P35980;G3UZJ6;G3UZK4;G3UYV6;G3UX28	P35980;G3UZJ6;G3UZK4	6;4;4;2;1	6;4;4;2;1	6;4;4;2;1	60S ribosomal protein L18	Rpl18	sp|P35980|RL18_MOUSE 60S ribosomal protein L18 OS=Mus musculus GN=Rpl18 PE=2 SV=3;tr|G3UZJ6|G3UZJ6_MOUSE 60S ribosomal protein L18 (Fragment) OS=Mus musculus GN=Rpl18 PE=3 SV=1;tr|G3UZK4|G3UZK4_MOUSE 60S ribosomal protein L18 OS=Mus musculus GN=Rpl18 PE=4	23088000	11112000	103190000	9222700	16279000	14612000	23088000	14612000	5	6	6	6	5	5	4	5	5	4	5	5	4	5	5	4	5	5	4	5	5	4	33.5	33.5	33.5	21.644	188	188;126;136;57;80	0	51.498	29.8	29.8	19.7	29.8
P38647	P38647	13	13	13	Stress-70 protein, mitochondrial	Hspa9	sp|P38647|GRP75_MOUSE Stress-70 protein, mitochondrial OS=Mus musculus GN=Hspa9 PE=1 SV=3	1364200	676870	177640000	1084500	358940	1289600	1364200	1084500	1	13	13	13	5	3	13	3	2	5	5	3	13	3	2	5	5	3	13	3	2	5	25.3	25.3	25.3	73.46	679	679	0	118.26	8.8	5.4	25.3	5.4
P41105;F6Z0X0	P41105	5;2	5;2	5;2	60S ribosomal protein L28	Rpl28	sp|P41105|RL28_MOUSE 60S ribosomal protein L28 OS=Mus musculus GN=Rpl28 PE=1 SV=2	270180	318500	85817000	427500	409630	487660	318500	427500	2	5	5	5	2	3	5	2	4	2	2	3	5	2	4	2	2	3	5	2	4	2	34.3	34.3	34.3	15.733	137	137;85	0	35.747	13.9	21.2	34.3	15.3
P46638;G3UY29;E9Q3P9;F8WGS1;G3UZD3;P62492;G3UZL4;D3YYB3;Q9WTL2	P46638;G3UY29;E9Q3P9;F8WGS1;G3UZD3;P62492;G3UZL4	8;7;7;7;7;7;5;1;1	8;7;7;7;7;7;5;1;1	8;7;7;7;7;7;5;1;1	Ras-related protein Rab-11B;Ras-related protein Rab-11A	Rab11b;Rab11a	sp|P46638|RB11B_MOUSE Ras-related protein Rab-11B OS=Mus musculus GN=Rab11b PE=1 SV=3;tr|G3UY29|G3UY29_MOUSE MCG22989, isoform CRA_a OS=Mus musculus GN=Rab11b PE=3 SV=1;tr|E9Q3P9|E9Q3P9_MOUSE Ras-related protein Rab-11A OS=Mus musculus GN=Rab11a PE=3 SV=1;	14455000	928250	27621000	3193100	1409300	303500	14455000	1409300	9	8	8	8	8	3	7	5	4	2	8	3	7	5	4	2	8	3	7	5	4	2	37.6	37.6	37.6	24.489	218	218;149;153;155;193;216;125;138;213	0	48.129	37.6	12.8	33.9	21.1
P47963	P47963	3	3	3	60S ribosomal protein L13	Rpl13	sp|P47963|RL13_MOUSE 60S ribosomal protein L13 OS=Mus musculus GN=Rpl13 PE=2 SV=3	1411400	655170	167460000	2536700	1013800	1007200	1411400	1013800	1	3	3	3	3	3	3	3	2	3	3	3	3	3	2	3	3	3	3	3	2	3	14.2	14.2	14.2	24.305	211	211	0	37.895	14.2	14.2	14.2	14.2
P48678;P48678-2;P48678-3;D3YUF7;P21619-2	P48678;P48678-2;P48678-3	28;27;21;6;2	28;27;21;6;2	26;25;19;6;0	Prelamin-A/C;Lamin-A/C	Lmna	sp|P48678|LMNA_MOUSE Prelamin-A/C OS=Mus musculus GN=Lmna PE=1 SV=2;sp|P48678-2|LMNA_MOUSE Isoform C of Prelamin-A/C OS=Mus musculus GN=Lmna;sp|P48678-3|LMNA_MOUSE Isoform C2 of Prelamin-A/C OS=Mus musculus GN=Lmna	1613600	609680	492450000	2471300	2278000	5955100	1613600	2471300	5	28	28	26	5	4	28	10	9	17	5	4	28	10	9	17	5	4	26	10	9	16	43.6	43.6	42.3	74.237	665	665;574;462;117;474	0	262.33	7.2	6.2	43.6	15.8
P48774;E9PVM7;E9PV63;E9Q024;E9Q5L9	P48774;E9PVM7;E9PV63	13;12;8;5;3	13;12;8;5;3	12;11;7;5;3	Glutathione S-transferase Mu 5	Gstm5	sp|P48774|GSTM5_MOUSE Glutathione S-transferase Mu 5 OS=Mus musculus GN=Gstm5 PE=1 SV=1;tr|E9PVM7|E9PVM7_MOUSE Glutathione S-transferase Mu 5 (Fragment) OS=Mus musculus GN=Gstm5 PE=3 SV=1;tr|E9PV63|E9PV63_MOUSE Glutathione S-transferase Mu 5 OS=Mus musculu	171420000	58062000	19872000	163740000	59178000	15107000	58062000	59178000	5	13	13	12	13	12	5	13	12	11	13	12	5	13	12	11	12	11	4	12	11	10	49.6	49.6	45.5	26.635	224	224;215;158;73;69	0	115.05	49.6	44.2	21.4	49.6
Q5EBP8;P49312;P49312-2	Q5EBP8;P49312;P49312-2	10;10;7	9;9;6	9;9;6	Heterogeneous nuclear ribonucleoprotein A1;Heterogeneous nuclear ribonucleoprotein A1, N-terminally processed	Hnrnpa1	tr|Q5EBP8|Q5EBP8_MOUSE Heterogeneous nuclear ribonucleoprotein A1 OS=Mus musculus GN=Hnrnpa1 PE=1 SV=1;sp|P49312|ROA1_MOUSE Heterogeneous nuclear ribonucleoprotein A1 OS=Mus musculus GN=Hnrnpa1 PE=1 SV=2;sp|P49312-2|ROA1_MOUSE Isoform Short of Heterogeneou	965200	778360	185050000	1318800	1051400	2102700	965200	1318800	3	10	9	9	3	4	10	6	5	8	2	3	9	5	4	7	2	3	9	5	4	7	27.1	24.7	24.7	38.833	373	373;320;268	0	73.296	8.6	12.1	27.1	19
P51150	P51150	2	2	2	Ras-related protein Rab-7a	Rab7a	sp|P51150|RAB7A_MOUSE Ras-related protein Rab-7a OS=Mus musculus GN=Rab7a PE=1 SV=2	933590	546370	12656000	270350	437450	81880	933590	270350	1	2	2	2	2	2	2	1	2	1	2	2	2	1	2	1	2	2	2	1	2	1	11.6	11.6	11.6	23.489	207	207	0	19.712	11.6	11.6	11.6	4.8
P51410;D3Z629;S4R1R7;D3YZT0	P51410;D3Z629;S4R1R7	4;3;2;1	4;3;2;1	4;3;2;1	60S ribosomal protein L9	Rpl9;Rpl9-ps1	sp|P51410|RL9_MOUSE 60S ribosomal protein L9 OS=Mus musculus GN=Rpl9 PE=1 SV=2;tr|D3Z629|D3Z629_MOUSE 60S ribosomal protein L9 OS=Mus musculus GN=Rpl9 PE=1 SV=1;tr|S4R1R7|S4R1R7_MOUSE MCG50795 OS=Mus musculus GN=Rpl9-ps1 PE=4 SV=1	3098900	1037200	41144000	2263000	1712800	535020	3098900	1712800	4	4	4	4	3	2	3	3	2	1	3	2	3	3	2	1	3	2	3	3	2	1	22.4	22.4	22.4	21.881	192	192;166;191;80	0	24.027	18.8	12.5	16.1	18.8
P51881	P51881	9	9	6	ADP/ATP translocase 2;ADP/ATP translocase 2, N-terminally processed	Slc25a5	sp|P51881|ADT2_MOUSE ADP/ATP translocase 2 OS=Mus musculus GN=Slc25a5 PE=1 SV=3	3820300	2067600	270920000	4841200	2563100	3915600	3820300	3915600	1	9	9	6	5	6	9	6	6	7	5	6	9	6	6	7	3	4	6	4	5	5	27.5	27.5	17.4	32.931	298	298	0	59.744	17.1	17.4	27.5	21.8
P52480-2;P52480;E9Q509;G3X925;P53657	P52480-2;P52480	16;16;1;1;1	16;16;1;1;1	16;16;1;1;1	Pyruvate kinase PKM	Pkm	sp|P52480-2|KPYM_MOUSE Isoform M1 of Pyruvate kinase PKM OS=Mus musculus GN=Pkm;sp|P52480|KPYM_MOUSE Pyruvate kinase PKM OS=Mus musculus GN=Pkm PE=1 SV=4	1739400	301380	420540000	1457500	253170	6287600	1739400	1457500	5	16	16	16	5	1	16	2	1	8	5	1	16	2	1	8	5	1	16	2	1	8	30.1	30.1	30.1	57.984	531	531;531;543;574;574	0	153.05	11.9	2.1	30.1	5.5
P56371	P56371	5	5	3	Ras-related protein Rab-4A	Rab4a	sp|P56371|RAB4A_MOUSE Ras-related protein Rab-4A OS=Mus musculus GN=Rab4a PE=1 SV=2	6815500	2051800	1060000	1371500	1678700	113310	2051800	1371500	1	5	5	3	5	4	1	3	3	1	5	4	1	3	3	1	3	3	0	2	2	1	23.9	23.9	17.4	24.408	218	218	0	28.524	23.9	17.4	4.1	11.5
P56480	P56480	11	11	11	ATP synthase subunit beta, mitochondrial	Atp5b	sp|P56480|ATPB_MOUSE ATP synthase subunit beta, mitochondrial OS=Mus musculus GN=Atp5b PE=1 SV=2	2266600	799840	165530000	996280	833560	2325100	2266600	996280	1	11	11	11	5	3	11	3	4	7	5	3	11	3	4	7	5	3	11	3	4	7	31.6	31.6	31.6	56.3	529	529	0	114.03	11.9	6.8	31.6	7
P58252;G3UXK8;G3UZ34;A2AH85;O08810	P58252	26;1;1;1;1	26;1;1;1;1	26;1;1;1;1	Elongation factor 2	Eef2	sp|P58252|EF2_MOUSE Elongation factor 2 OS=Mus musculus GN=Eef2 PE=1 SV=2	2198200	607380	538310000	1243300	1094900	4977600	2198200	1243300	5	26	26	26	5	3	26	4	4	12	5	3	26	4	4	12	5	3	26	4	4	12	30	30	30	95.313	858	858;85;962;972;971	0	183.82	5.4	3.1	30	4.2
P60710;P63260;E9Q1F2;E9Q5F4;G3UZ07;B1ATY1;G3UYG0;E9Q606;Q8BFZ3;E9Q2D1;F8WGM8;F6WX90;V9GXQ2;E9Q3M9	P60710;P63260;E9Q1F2;E9Q5F4;G3UZ07	19;18;14;13;11;9;8;8;6;5;4;3;2;1	19;18;14;13;11;9;8;8;6;5;4;3;2;1	7;6;6;4;3;3;1;1;1;1;3;0;0;0	Actin, cytoplasmic 1;Actin, cytoplasmic 1, N-terminally processed;Actin, cytoplasmic 2;Actin, cytoplasmic 2, N-terminally processed	Actb;Actg1	sp|P60710|ACTB_MOUSE Actin, cytoplasmic 1 OS=Mus musculus GN=Actb PE=1 SV=1;sp|P63260|ACTG_MOUSE Actin, cytoplasmic 2 OS=Mus musculus GN=Actg1 PE=1 SV=1;tr|E9Q1F2|E9Q1F2_MOUSE Actin, cytoplasmic 1 OS=Mus musculus GN=Actb PE=3 SV=1;tr|E9Q5F4|E9Q5F4_MOUSE Ac	38421000	20996000	4184900000	30242000	16377000	47055000	38421000	30242000	14	19	19	7	15	16	19	15	15	17	15	16	19	15	15	17	4	4	7	4	4	5	55.5	55.5	29.3	41.736	375	375;375;295;265;268;153;132;150;376;108;105;43;156;1175	0	228.46	42.4	42.7	55.5	42.4
P60843;Q8BTU6;P10630;P10630-2;E9Q561;D6RJ60;D6RJ11;A2AFK7;E9PV04;Q91VC3	P60843;Q8BTU6;P10630;P10630-2	16;8;8;8;5;1;1;1;1;1	16;8;8;8;5;1;1;1;1;1	16;8;8;8;5;1;1;1;1;1	Eukaryotic initiation factor 4A-I;Eukaryotic initiation factor 4A-II;Eukaryotic initiation factor 4A-II, N-terminally processed	Eif4a1;Eif4a2	sp|P60843|IF4A1_MOUSE Eukaryotic initiation factor 4A-I OS=Mus musculus GN=Eif4a1 PE=1 SV=1;tr|Q8BTU6|Q8BTU6_MOUSE Eukaryotic initiation factor 4A-II OS=Mus musculus GN=Eif4a2 PE=2 SV=1;sp|P10630|IF4A2_MOUSE Eukaryotic initiation factor 4A-II OS=Mus muscul	1211600	390310	328010000	794420	462100	3030600	1211600	794420	10	16	16	16	2	2	16	2	3	11	2	2	16	2	3	11	2	2	16	2	3	11	43.8	43.8	43.8	46.153	406	406;362;407;408;312;96;97;299;411;411	0	125.38	4.9	4.4	43.8	4.4
P60867	P60867	2	2	2	40S ribosomal protein S20	Rps20	sp|P60867|RS20_MOUSE 40S ribosomal protein S20 OS=Mus musculus GN=Rps20 PE=1 SV=1	1239100	2456700	44482000	490610	1263300	1033400	2456700	1033400	1	2	2	2	2	2	2	1	2	2	2	2	2	1	2	2	2	2	2	1	2	2	19.3	19.3	19.3	13.373	119	119	0	17.174	19.3	19.3	19.3	9.2
P61027	P61027	2	1	1	Ras-related protein Rab-10	Rab10	sp|P61027|RAB10_MOUSE Ras-related protein Rab-10 OS=Mus musculus GN=Rab10 PE=1 SV=1	2759300	1387300	5583900	296480	1607900	174880	2759300	296480	1	2	1	1	2	1	2	2	1	1	1	1	1	1	1	1	1	1	1	1	1	1	11.5	6	6	22.541	200	200	0	6.9171	11.5	6	11.5	11.5
P84078;P61205;P84084;Q8BSL7	P84078;P61205;P84084;Q8BSL7	3;3;2;2	3;3;2;2	2;2;1;1	ADP-ribosylation factor 1;ADP-ribosylation factor 3;ADP-ribosylation factor 5;ADP-ribosylation factor 2	Arf1;Arf3;Arf5;Arf2	sp|P84078|ARF1_MOUSE ADP-ribosylation factor 1 OS=Mus musculus GN=Arf1 PE=1 SV=2;sp|P61205|ARF3_MOUSE ADP-ribosylation factor 3 OS=Mus musculus GN=Arf3 PE=2 SV=2;sp|P84084|ARF5_MOUSE ADP-ribosylation factor 5 OS=Mus musculus GN=Arf5 PE=1 SV=2;sp|Q8BSL7|ARF	562580	172100	59470000	514180	392100	693100	562580	514180	4	3	3	2	2	1	3	2	1	2	2	1	3	2	1	2	1	0	2	1	0	1	19.3	19.3	13.3	20.697	181	181;181;180;181	0	26.993	13.8	6.1	19.3	13.8
P61358;A2A4Q0	P61358	5;2	5;2	5;2	60S ribosomal protein L27	Rpl27	sp|P61358|RL27_MOUSE 60S ribosomal protein L27 OS=Mus musculus GN=Rpl27 PE=1 SV=2	654230	363640	82431000	143130	172760	893380	654230	172760	2	5	5	5	2	2	5	1	1	4	2	2	5	1	1	4	2	2	5	1	1	4	43.4	43.4	43.4	15.798	136	136;87	0	32.613	22.1	12.5	43.4	5.9
P61514	P61514	3	3	3	60S ribosomal protein L37a	Rpl37a	sp|P61514|RL37A_MOUSE 60S ribosomal protein L37a OS=Mus musculus GN=Rpl37a PE=2 SV=2	144500	51637	19118000	139570	57875	382780	144500	139570	1	3	3	3	1	1	3	1	1	2	1	1	3	1	1	2	1	1	3	1	1	2	37	37	37	10.275	92	92	0	22.307	9.8	9.8	37	9.8
P62242	P62242	7	7	7	40S ribosomal protein S8	Rps8	sp|P62242|RS8_MOUSE 40S ribosomal protein S8 OS=Mus musculus GN=Rps8 PE=1 SV=2	207230	793420	129610000	979670	858490	2450700	793420	979670	1	7	7	7	1	3	7	4	4	4	1	3	7	4	4	4	1	3	7	4	4	4	38.5	38.5	38.5	24.205	208	208	0	74.806	6.2	16.3	38.5	19.2
P62259;D6REF3;F6WA09	P62259;D6REF3;F6WA09	12;8;8	12;8;8	10;6;7	14-3-3 protein epsilon	Ywhae	sp|P62259|1433E_MOUSE 14-3-3 protein epsilon OS=Mus musculus GN=Ywhae PE=1 SV=1;tr|D6REF3|D6REF3_MOUSE 14-3-3 protein epsilon OS=Mus musculus GN=Ywhae PE=4 SV=1;tr|F6WA09|F6WA09_MOUSE 14-3-3 protein epsilon (Fragment) OS=Mus musculus GN=Ywhae PE=4 SV=1	3956700	1893400	276790000	4063400	1892200	4689800	3956700	4063400	3	12	12	10	2	3	12	3	2	5	2	3	12	3	2	5	1	1	10	2	1	4	40.8	40.8	34.9	29.174	255	255;130;154	0	97.973	6.3	9	40.8	11
P62281	P62281	5	5	5	40S ribosomal protein S11	Rps11	sp|P62281|RS11_MOUSE 40S ribosomal protein S11 OS=Mus musculus GN=Rps11 PE=1 SV=3	821550	372840	97300000	973440	733730	547790	821550	733730	1	5	5	5	3	3	5	4	3	2	3	3	5	4	3	2	3	3	5	4	3	2	26.6	26.6	26.6	18.431	158	158	0	28.511	16.5	17.1	26.6	21.5
P62702;Q3V1Z5;V9GWY0	P62702;Q3V1Z5;V9GWY0	11;7;6	11;7;6	11;7;6	40S ribosomal protein S4, X isoform;40S ribosomal protein S4	Rps4x;Rps4l;Gm15013	sp|P62702|RS4X_MOUSE 40S ribosomal protein S4, X isoform OS=Mus musculus GN=Rps4x PE=2 SV=2;tr|Q3V1Z5|Q3V1Z5_MOUSE 40S ribosomal protein S4 OS=Mus musculus GN=Rps4l PE=2 SV=1;tr|V9GWY0|V9GWY0_MOUSE 40S ribosomal protein S4 OS=Mus musculus GN=Gm15013 PE=3 S	381520	259510	282410000	991430	662130	2356600	381520	991430	3	11	11	11	1	2	11	5	3	7	1	2	11	5	3	7	1	2	11	5	3	7	41.4	41.4	41.4	29.597	263	263;262;266	0	85.274	2.7	6.5	41.4	16
P62717;F6YJW4	P62717;F6YJW4	3;2	3;2	3;2	60S ribosomal protein L18a	Rpl18a;Gm17541	sp|P62717|RL18A_MOUSE 60S ribosomal protein L18a OS=Mus musculus GN=Rpl18a PE=1 SV=1;tr|F6YJW4|F6YJW4_MOUSE 60S ribosomal protein L18a OS=Mus musculus GN=Gm17541 PE=3 SV=1	2071100	253640	51099000	550060	288080	177990	2071100	288080	2	3	3	3	2	1	3	2	1	1	2	1	3	2	1	1	2	1	3	2	1	1	14.2	14.2	14.2	20.732	176	176;174	0	18.771	10.2	4.5	14.2	8.5
P62751;D3YTY6	P62751	5;1	5;1	5;1	60S ribosomal protein L23a	Rpl23a	sp|P62751|RL23A_MOUSE 60S ribosomal protein L23a OS=Mus musculus GN=Rpl23a PE=1 SV=1	1633300	544810	65233000	835410	977940	714030	1633300	835410	2	5	5	5	3	3	5	2	4	3	3	3	5	2	4	3	3	3	5	2	4	3	26.3	26.3	26.3	17.695	156	156;151	0	30.131	20.5	18.6	26.3	12.2
P62806	P62806	7	7	7	Histone H4	Hist1h4a	sp|P62806|H4_MOUSE Histone H4 OS=Mus musculus GN=Hist1h4a PE=1 SV=2	16983000	14262000	3236400000	19000000	7072000	35814000	16983000	19000000	1	7	7	7	4	4	7	4	4	6	4	4	7	4	4	6	4	4	7	4	4	6	52.4	52.4	52.4	11.367	103	103	0	79.426	38.8	38.8	52.4	38.8
P62827;Q14AA6;Q61820	P62827;Q14AA6	11;7;4	11;7;4	11;7;4	GTP-binding nuclear protein Ran	Ran;1700009N14Rik	sp|P62827|RAN_MOUSE GTP-binding nuclear protein Ran OS=Mus musculus GN=Ran PE=1 SV=3;tr|Q14AA6|Q14AA6_MOUSE MCG49183 OS=Mus musculus GN=1700009N14Rik PE=2 SV=1	196380000	50389000	239750000	109700000	57443000	13346000	196380000	57443000	3	11	11	11	11	9	10	10	8	8	11	9	10	10	8	8	11	9	10	10	8	8	48.1	48.1	48.1	24.423	216	216;216;216	0	95.333	48.1	41.7	48.1	48.1
P62852	P62852	4	4	4	40S ribosomal protein S25	Rps25	sp|P62852|RS25_MOUSE 40S ribosomal protein S25 OS=Mus musculus GN=Rps25 PE=1 SV=1	1022300	189140	80335000	841780	318110	939460	1022300	841780	1	4	4	4	3	1	4	2	2	3	3	1	4	2	2	3	3	1	4	2	2	3	28	28	28	13.742	125	125	0	24.827	20	7.2	28	12.8
P62889	P62889	1	1	1	60S ribosomal protein L30	Rpl30	sp|P62889|RL30_MOUSE 60S ribosomal protein L30 OS=Mus musculus GN=Rpl30 PE=2 SV=2	193790	182270	31985000	185220	110220	188670	193790	185220	1	1	1	1	1	1	1	1	1	1	1	1	1	1	1	1	1	1	1	1	1	1	7	7	7	12.784	115	115	0.0048701	6.0802	7	7	7	7
P62900	P62900	3	3	3	60S ribosomal protein L31	Rpl31	sp|P62900|RL31_MOUSE 60S ribosomal protein L31 OS=Mus musculus GN=Rpl31 PE=1 SV=1	509060	943280	99217000	266610	514920	658020	943280	514920	1	3	3	3	2	2	3	1	3	3	2	2	3	1	3	3	2	2	3	1	3	3	21.6	21.6	21.6	14.463	125	125	0	21.936	15.2	13.6	21.6	7.2
P62908;D3YV43	P62908;D3YV43	7;6	7;6	7;6	40S ribosomal protein S3	Rps3	sp|P62908|RS3_MOUSE 40S ribosomal protein S3 OS=Mus musculus GN=Rps3 PE=1 SV=1;tr|D3YV43|D3YV43_MOUSE 40S ribosomal protein S3 OS=Mus musculus GN=Rps3 PE=1 SV=1	250360	729290	135460000	1016800	842230	2400900	729290	1016800	2	7	7	7	1	3	7	3	4	6	1	3	7	3	4	6	1	3	7	3	4	6	30.5	30.5	30.5	26.674	243	243;191	0	49.63	3.7	12.8	30.5	12.3
P63011;D3YZP5	P63011	6;1	6;1	5;1	Ras-related protein Rab-3A	Rab3a	sp|P63011|RAB3A_MOUSE Ras-related protein Rab-3A OS=Mus musculus GN=Rab3a PE=1 SV=1	58622000	11097000	552740	27324000	12427000	1887300	11097000	12427000	2	6	6	5	6	6	1	6	6	4	6	6	1	6	6	4	5	5	1	5	5	3	34.1	34.1	30.5	24.97	220	220;62	0	86.634	34.1	34.1	7.3	34.1
P63017;Q504P4;P17156;D3Z5E2;D3YW43	P63017;Q504P4	23;22;10;6;5	21;20;8;5;4	17;16;5;4;3	Heat shock cognate 71 kDa protein	Hspa8	sp|P63017|HSP7C_MOUSE Heat shock cognate 71 kDa protein OS=Mus musculus GN=Hspa8 PE=1 SV=1;tr|Q504P4|Q504P4_MOUSE Heat shock cognate 71 kDa protein OS=Mus musculus GN=Hspa8 PE=1 SV=1	3224500	1781700	746200000	2283200	674090	6837800	3224500	2283200	5	23	21	17	10	8	23	9	5	17	8	7	21	7	3	15	7	7	17	7	3	14	36.8	35.1	28	70.87	646	646;627;633;116;158	0	190.27	18.3	13.8	36.8	16.1
P63038;P63038-2;D3Z2F2;D3Z7J9	P63038	23;11;5;3	23;11;5;3	23;11;5;3	60 kDa heat shock protein, mitochondrial	Hspd1	sp|P63038|CH60_MOUSE 60 kDa heat shock protein, mitochondrial OS=Mus musculus GN=Hspd1 PE=1 SV=1	4493600	2200700	794970000	2831400	1768800	5340400	4493600	2831400	4	23	23	23	7	6	23	6	4	14	7	6	23	6	4	14	7	6	23	6	4	14	37.9	37.9	37.9	60.955	573	573;258;202;142	0	188.86	15.4	10.5	37.9	12.2
P63073	P63073	4	4	4	Eukaryotic translation initiation factor 4E	Eif4e	sp|P63073|IF4E_MOUSE Eukaryotic translation initiation factor 4E OS=Mus musculus GN=Eif4e PE=1 SV=1	3465400	918370	3041400	15721000	1301600	196090	3041400	1301600	1	4	4	4	3	2	1	4	4	1	3	2	1	4	4	1	3	2	1	4	4	1	20.3	20.3	20.3	25.053	217	217	0	28.337	15.2	10.1	6.5	20.3
P63101;D3YXN6;D3YXF4;D3YW45	P63101	9;4;3;2	7;2;2;1	4;2;2;1	14-3-3 protein zeta/delta	Ywhaz	sp|P63101|1433Z_MOUSE 14-3-3 protein zeta/delta OS=Mus musculus GN=Ywhaz PE=1 SV=1	856160	432140	106670000	992160	558490	1263300	856160	992160	4	9	7	4	4	5	9	4	5	6	3	3	7	3	4	5	2	2	4	2	2	3	34.7	28.6	21.6	27.771	245	245;88;45;26	0	97.569	16.3	18.4	34.7	16.3
P63321;Q9JIW9	P63321;Q9JIW9	2;1	2;1	2;1	Ras-related protein Ral-A;Ras-related protein Ral-B	Rala;Ralb	sp|P63321|RALA_MOUSE Ras-related protein Ral-A OS=Mus musculus GN=Rala PE=1 SV=1;sp|Q9JIW9|RALB_MOUSE Ras-related protein Ral-B OS=Mus musculus GN=Ralb PE=2 SV=1	3665200	105700	5332900	2413100	354440	113960	3665200	354440	2	2	2	2	2	1	2	2	2	1	2	1	2	2	2	1	2	1	2	2	2	1	10.7	10.7	10.7	23.553	206	206;206	0	11.162	10.7	3.4	10.7	10.7
Q5SQG5;P67778	Q5SQG5;P67778	3;3	3;3	3;3	Prohibitin	Phb	tr|Q5SQG5|Q5SQG5_MOUSE Prohibitin (Fragment) OS=Mus musculus GN=Phb PE=1 SV=1;sp|P67778|PHB_MOUSE Prohibitin OS=Mus musculus GN=Phb PE=1 SV=1	286560	128690	36143000	459360	168440	434420	286560	434420	2	3	3	3	1	1	3	2	1	2	1	1	3	2	1	2	1	1	3	2	1	2	15	15	15	22.999	207	207;272	0	20.427	4.8	4.8	15	9.7
P67871;G3UXG7;G3UZJ5;G3UZA4;G3UXU2;G3UZX4;G3UWU5	P67871;G3UXG7;G3UZJ5;G3UZA4;G3UXU2;G3UZX4	6;5;4;3;3;3;1	6;5;4;3;3;3;1	6;5;4;3;3;3;1	Casein kinase II subunit beta	Csnk2b	sp|P67871|CSK2B_MOUSE Casein kinase II subunit beta OS=Mus musculus GN=Csnk2b PE=1 SV=1;tr|G3UXG7|G3UXG7_MOUSE Casein kinase II subunit beta OS=Mus musculus GN=Csnk2b PE=4 SV=1;tr|G3UZJ5|G3UZJ5_MOUSE Casein kinase II subunit beta (Fragment) OS=Mus musculus	13903000	4444600	6251800	22399000	3934200	1229400	6251800	3934200	7	6	6	6	6	6	2	6	4	3	6	6	2	6	4	3	6	6	2	6	4	3	31.2	31.2	31.2	24.942	215	215;164;206;123;180;257;58	0	45.404	31.2	31.2	7.9	31.2
P67984	P67984	3	3	3	60S ribosomal protein L22	Rpl22	sp|P67984|RL22_MOUSE 60S ribosomal protein L22 OS=Mus musculus GN=Rpl22 PE=1 SV=2	831070	4637300	63439000	227650	1798000	1715400	4637300	1715400	1	3	3	3	3	3	3	1	3	3	3	3	3	1	3	3	3	3	3	1	3	3	30.5	30.5	30.5	14.759	128	128	0	31.04	30.5	30.5	30.5	11.7
P80315;G5E839;G3UYW5;G3UXF3;G3UXG2	P80315;G5E839	8;7;2;1;1	8;7;2;1;1	8;7;2;1;1	T-complex protein 1 subunit delta	Cct4	sp|P80315|TCPD_MOUSE T-complex protein 1 subunit delta OS=Mus musculus GN=Cct4 PE=1 SV=3;tr|G5E839|G5E839_MOUSE T-complex protein 1 subunit delta OS=Mus musculus GN=Cct4 PE=1 SV=1	1261700	183040	80633000	341890	141480	287360	1261700	287360	5	8	8	8	2	1	8	1	1	3	2	1	8	1	1	3	2	1	8	1	1	3	15.6	15.6	15.6	58.066	539	539;509;120;47;59	0	55.879	3.9	2.4	15.6	2.4
P97315	P97315	2	2	2	Cysteine and glycine-rich protein 1	Csrp1	sp|P97315|CSRP1_MOUSE Cysteine and glycine-rich protein 1 OS=Mus musculus GN=Csrp1 PE=1 SV=3	3382400	1244400	8770800	536210	1255500	166580	3382400	536210	1	2	2	2	2	2	1	1	2	1	2	2	1	1	2	1	2	2	1	1	2	1	16.6	16.6	16.6	20.583	193	193	0	19.146	16.6	16.6	7.8	7.8
P97351	P97351	5	5	5	40S ribosomal protein S3a	Rps3a	sp|P97351|RS3A_MOUSE 40S ribosomal protein S3a OS=Mus musculus GN=Rps3a PE=1 SV=3	657500	118840	71827000	257980	315170	591350	657500	315170	1	5	5	5	2	1	5	2	2	3	2	1	5	2	2	3	2	1	5	2	2	3	15.5	15.5	15.5	29.885	264	264	0	30.511	6.8	3	15.5	6.8
P99024;Q9CWF2;Q7TMM9	P99024;Q9CWF2;Q7TMM9	16;12;12	16;12;12	2;0;0	Tubulin beta-5 chain;Tubulin beta-2B chain;Tubulin beta-2A chain	Tubb5;Tubb2b;Tubb2a	sp|P99024|TBB5_MOUSE Tubulin beta-5 chain OS=Mus musculus GN=Tubb5 PE=1 SV=1;sp|Q9CWF2|TBB2B_MOUSE Tubulin beta-2B chain OS=Mus musculus GN=Tubb2b PE=1 SV=1;sp|Q7TMM9|TBB2A_MOUSE Tubulin beta-2A chain OS=Mus musculus GN=Tubb2a PE=1 SV=1	449610	1080200	849540000	1275200	392540	8236300	1080200	1275200	3	16	16	2	2	5	16	3	2	12	2	5	16	3	2	12	1	1	2	1	1	2	36.9	36.9	6.1	49.67	444	444;445;445	0	164.25	4.5	11	36.9	7
Q02257;E9Q6A9;Q02248	Q02257	15;2;2	15;2;2	15;2;2	Junction plakoglobin	Jup	sp|Q02257|PLAK_MOUSE Junction plakoglobin OS=Mus musculus GN=Jup PE=1 SV=3	33958000	2136800	6729200	12276000	8448100	9383700	6729200	9383700	3	15	15	15	15	7	5	13	10	12	15	7	5	13	10	12	15	7	5	13	10	12	25.4	25.4	25.4	81.8	745	745;607;781	0	113.09	25.4	9.5	6.4	20.9
Q03265;D3Z6F5;D6RJ16	Q03265;D3Z6F5	13;12;2	13;12;2	13;12;2	ATP synthase subunit alpha, mitochondrial;ATP synthase subunit alpha	Atp5a1	sp|Q03265|ATPA_MOUSE ATP synthase subunit alpha, mitochondrial OS=Mus musculus GN=Atp5a1 PE=1 SV=1;tr|D3Z6F5|D3Z6F5_MOUSE ATP synthase subunit alpha OS=Mus musculus GN=Atp5a1 PE=1 SV=1	3773000	2307200	273230000	2883500	2067800	3488600	3773000	2883500	3	13	13	13	8	8	13	8	9	9	8	8	13	8	9	9	8	8	13	8	9	9	26.9	26.9	26.9	59.752	553	553;503;89	0	129.41	15.2	16.3	26.9	14.6
Q07797;F6VRP8;E9Q5X5	Q07797	7;1;1	7;1;1	7;1;1	Galectin-3-binding protein	Lgals3bp	sp|Q07797|LG3BP_MOUSE Galectin-3-binding protein OS=Mus musculus GN=Lgals3bp PE=1 SV=1	6732900	4301600	999550	8063300	5524900	1796500	4301600	5524900	3	7	7	7	5	5	2	5	6	4	5	5	2	5	6	4	5	5	2	5	6	4	16.1	16.1	16.1	64.49	577	577;139;204	0	54.801	13.7	10.7	5.2	13.7
Q3UV17	Q3UV17	10	1	1	Keratin, type II cytoskeletal 2 oral	Krt76	sp|Q3UV17|K22O_MOUSE Keratin, type II cytoskeletal 2 oral OS=Mus musculus GN=Krt76 PE=2 SV=1	793360000	31614000	260480000	417760000	239060000	198080000	260480000	239060000	1	10	1	1	10	10	9	10	10	10	1	1	1	1	1	1	1	1	1	1	1	1	10.8	1.5	1.5	62.844	594	594	0	8.7891	10.8	10.8	10.8	10.8
Q9DAY9;Q5SQB0;Q5SQB5;Q61937;E9Q5T3	Q9DAY9;Q5SQB0;Q5SQB5;Q61937;E9Q5T3	2;2;2;2;1	2;2;2;2;1	2;2;2;2;1	Nucleophosmin	Npm1;Gm5611	tr|Q9DAY9|Q9DAY9_MOUSE Nucleophosmin OS=Mus musculus GN=Npm1 PE=1 SV=1;tr|Q5SQB0|Q5SQB0_MOUSE Nucleophosmin OS=Mus musculus GN=Npm1 PE=1 SV=1;tr|Q5SQB5|Q5SQB5_MOUSE Nucleophosmin OS=Mus musculus GN=Npm1 PE=1 SV=1;sp|Q61937|NPM_MOUSE Nucleophosmin OS=Mus mu	273350	136940	31442000	156070	159990	219860	273350	159990	5	2	2	2	1	1	2	1	1	1	1	1	2	1	1	1	1	1	2	1	1	1	10.9	10.9	10.9	28.385	257	257;264;285;292;272	0	13.254	3.5	3.5	10.9	3.5
Q5XJF6;P53026;D6RE43	Q5XJF6;P53026	10;9;2	10;9;2	10;9;2	Ribosomal protein;60S ribosomal protein L10a	Rpl10a	tr|Q5XJF6|Q5XJF6_MOUSE Ribosomal protein OS=Mus musculus GN=Rpl10a PE=1 SV=1;sp|P53026|RL10A_MOUSE 60S ribosomal protein L10a OS=Mus musculus GN=Rpl10a PE=1 SV=3	7188200	10416000	82676000	235670000	19458000	5766200	10416000	19458000	3	10	10	10	6	7	7	10	8	6	6	7	7	10	8	6	6	7	7	10	8	6	41.9	41.9	41.9	24.831	217	217;217;58	0	84.454	33.6	37.3	33.2	41.9
Q60692	Q60692	1	1	1	Proteasome subunit beta type-6	Psmb6	sp|Q60692|PSB6_MOUSE Proteasome subunit beta type-6 OS=Mus musculus GN=Psmb6 PE=1 SV=3	916970	258210	6081500	566620	303900	166590	916970	303900	1	1	1	1	1	1	1	1	1	1	1	1	1	1	1	1	1	1	1	1	1	1	4.2	4.2	4.2	25.378	238	238	0	6.6324	4.2	4.2	4.2	4.2
Q60932-2;Q60932;F2Z471	Q60932-2;Q60932;F2Z471	6;6;4	6;6;4	6;6;4	Voltage-dependent anion-selective channel protein 1	Vdac1	sp|Q60932-2|VDAC1_MOUSE Isoform Mt-VDAC1 of Voltage-dependent anion-selective channel protein 1 OS=Mus musculus GN=Vdac1;sp|Q60932|VDAC1_MOUSE Voltage-dependent anion-selective channel protein 1 OS=Mus musculus GN=Vdac1 PE=1 SV=3;tr|F2Z471|F2Z471_MOUSE Vol	2901900	532910	100380000	1969500	963800	376080	2901900	963800	3	6	6	6	3	2	6	4	4	2	3	2	6	4	4	2	3	2	6	4	4	2	29.7	29.7	29.7	30.755	283	283;296;254	0	52.394	15.2	8.1	29.7	15.9
Q61171	Q61171	2	2	2	Peroxiredoxin-2	Prdx2	sp|Q61171|PRDX2_MOUSE Peroxiredoxin-2 OS=Mus musculus GN=Prdx2 PE=1 SV=3	3455900	1358400	260390000	2487200	1522400	3767000	3455900	2487200	1	2	2	2	2	2	2	2	2	2	2	2	2	2	2	2	2	2	2	2	2	2	9.1	9.1	9.1	21.778	198	198	0	17.176	9.1	9.1	9.1	9.1
Q61205;D3Z7E6;D3Z2X5;Q8CA83	Q61205;D3Z7E6	9;7;4;3	9;7;4;3	9;7;4;3	Platelet-activating factor acetylhydrolase IB subunit gamma	Pafah1b3	sp|Q61205|PA1B3_MOUSE Platelet-activating factor acetylhydrolase IB subunit gamma OS=Mus musculus GN=Pafah1b3 PE=1 SV=1;tr|D3Z7E6|D3Z7E6_MOUSE Platelet-activating factor acetylhydrolase IB subunit gamma OS=Mus musculus GN=Pafah1b3 PE=4 SV=1	2768700	1639300	3169100	26546000	2829900	1509300	2768700	2829900	4	9	9	9	6	6	3	9	7	7	6	6	3	9	7	7	6	6	3	9	7	7	42.7	42.7	42.7	25.853	232	232;180;143;157	0	64.459	28.9	32.8	10.8	42.7
Q9D8L3;Q62186	Q9D8L3;Q62186	2;2	2;2	2;2	Translocon-associated protein subunit delta	Ssr4	tr|Q9D8L3|Q9D8L3_MOUSE Signal sequence receptor, delta OS=Mus musculus GN=Ssr4 PE=2 SV=1;sp|Q62186|SSRD_MOUSE Translocon-associated protein subunit delta OS=Mus musculus GN=Ssr4 PE=2 SV=1	49729	626380	17976000	40605	213130	430590	626380	213130	2	2	2	2	1	2	2	1	1	1	1	2	2	1	1	1	1	2	2	1	1	1	12.1	12.1	12.1	19.007	173	173;172	0	15.645	5.8	12.1	12.1	5.8
Q62348	Q62348	7	7	7	Translin	Tsn	sp|Q62348|TSN_MOUSE Translin OS=Mus musculus GN=Tsn PE=1 SV=1	16637000	764300	13541000	8841500	616990	91832	13541000	616990	1	7	7	7	7	3	7	7	2	1	7	3	7	7	2	1	7	3	7	7	2	1	28.5	28.5	28.5	26.201	228	228	0	51.559	28.5	16.7	28.5	28.5
Q64310;E0CXD9;F7CH13	Q64310;E0CXD9;F7CH13	3;2;2	3;2;2	3;2;2	Surfeit locus protein 4	Surf4	sp|Q64310|SURF4_MOUSE Surfeit locus protein 4 OS=Mus musculus GN=Surf4 PE=2 SV=1;tr|E0CXD9|E0CXD9_MOUSE Surfeit locus protein 4 OS=Mus musculus GN=Surf4 PE=4 SV=1;tr|F7CH13|F7CH13_MOUSE Surfeit locus protein 4 (Fragment) OS=Mus musculus GN=Surf4 PE=4 SV=1	15924000	5144600	10614000	6708500	5175800	829560	10614000	5175800	3	3	3	3	3	3	2	3	2	2	3	3	2	3	2	2	3	3	2	3	2	2	10	10	10	30.381	269	269;82;124	0	18.567	10	10	6.7	10
Q64433	Q64433	3	3	3	10 kDa heat shock protein, mitochondrial	Hspe1	sp|Q64433|CH10_MOUSE 10 kDa heat shock protein, mitochondrial OS=Mus musculus GN=Hspe1 PE=1 SV=2	506060	247990	58961000	394280	330000	594930	506060	394280	1	3	3	3	1	1	3	1	1	1	1	1	3	1	1	1	1	1	3	1	1	1	26.5	26.5	26.5	10.963	102	102	0	18.637	6.9	6.9	26.5	6.9
Q6ZWN5;F7CJS8;D3YWH9;Q9CXW7;D3Z673;D3YUV6	Q6ZWN5;F7CJS8;D3YWH9;Q9CXW7	11;9;9;9;3;2	11;9;9;9;3;2	11;9;9;9;3;2	40S ribosomal protein S9	Rps9	sp|Q6ZWN5|RS9_MOUSE 40S ribosomal protein S9 OS=Mus musculus GN=Rps9 PE=1 SV=3;tr|F7CJS8|F7CJS8_MOUSE 40S ribosomal protein S9 (Fragment) OS=Mus musculus GN=Rps9 PE=1 SV=1;tr|D3YWH9|D3YWH9_MOUSE 40S ribosomal protein S9 OS=Mus musculus GN=Rps9 PE=1 SV=1;tr	28928000	14608000	221430000	11871000	28274000	4196900	28928000	11871000	6	11	11	11	10	11	11	10	11	8	10	11	11	10	11	8	10	11	11	10	11	8	41.8	41.8	41.8	22.591	194	194;135;136;139;79;58	0	69.222	37.6	41.8	41.8	41.2
Q6ZWZ7;Q9CPR4;B2RY53	Q6ZWZ7;Q9CPR4	4;4;1	4;4;1	4;4;1	60S ribosomal protein L17	Rpl17	tr|Q6ZWZ7|Q6ZWZ7_MOUSE 60S ribosomal protein L17 OS=Mus musculus GN=Rpl17 PE=2 SV=1;sp|Q9CPR4|RL17_MOUSE 60S ribosomal protein L17 OS=Mus musculus GN=Rpl17 PE=2 SV=3	3933600	836320	29565000	2316600	1114700	524310	3933600	1114700	3	4	4	4	4	3	4	3	3	3	4	3	4	3	3	3	4	3	4	3	3	3	26.1	26.1	26.1	21.397	184	184;184;190	0	26.937	26.1	17.4	26.1	18.5
Q792Z1	Q792Z1	2	2	2		Try10	tr|Q792Z1|Q792Z1_MOUSE MCG140784 OS=Mus musculus GN=Try10 PE=2 SV=1	301100000	286640000	214670000	236560000	276440000	208780000	286640000	236560000	1	2	2	2	2	1	1	2	1	1	2	1	1	2	1	1	2	1	1	2	1	1	8.1	8.1	8.1	26.221	246	246	0	16.042	8.1	4.1	4.1	8.1
Q8BGQ7	Q8BGQ7	11	11	11	Alanine--tRNA ligase, cytoplasmic	Aars	sp|Q8BGQ7|SYAC_MOUSE Alanine--tRNA ligase, cytoplasmic OS=Mus musculus GN=Aars PE=1 SV=1	1042700	432360	88891000	2458600	560400	480760	1042700	560400	1	11	11	11	3	3	11	2	3	3	3	3	11	2	3	3	3	3	11	2	3	3	11.5	11.5	11.5	106.91	968	968	0	73.357	2.7	2.7	11.5	1.9
Q8BGZ2-2;Q8BGZ2	Q8BGZ2-2;Q8BGZ2	4;4	4;4	4;4	Protein FAM168A	Fam168a	sp|Q8BGZ2-2|F168A_MOUSE Isoform 2 of Protein FAM168A OS=Mus musculus GN=Fam168a;sp|Q8BGZ2|F168A_MOUSE Protein FAM168A OS=Mus musculus GN=Fam168a PE=2 SV=1	10797000	9561500	5250200	7076500	21886000	6896600	9561500	7076500	2	4	4	4	3	3	2	3	4	3	3	3	2	3	4	3	3	3	2	3	4	3	21.3	21.3	21.3	25.061	235	235;244	0	27.243	15.3	17	7.7	15.3
Q8BHH2	Q8BHH2	2	2	2	Ras-related protein Rab-9B	Rab9b	sp|Q8BHH2|RAB9B_MOUSE Ras-related protein Rab-9B OS=Mus musculus GN=Rab9b PE=2 SV=1	2911900	607090	1060500	1998500	857630	138730	1060500	857630	1	2	2	2	2	1	1	2	2	1	2	1	1	2	2	1	2	1	1	2	2	1	12.4	12.4	12.4	22.704	201	201	0	15.487	12.4	5.5	5.5	12.4
Q8BP67;F6RSK3	Q8BP67	3;1	3;1	3;1	60S ribosomal protein L24	Rpl24	sp|Q8BP67|RL24_MOUSE 60S ribosomal protein L24 OS=Mus musculus GN=Rpl24 PE=1 SV=2	1619800	1056500	67077000	1600300	1116900	1036100	1619800	1116900	2	3	3	3	3	3	3	3	2	2	3	3	3	3	2	2	3	3	3	3	2	2	19.1	19.1	19.1	17.779	157	157;157	0	21.277	19.1	19.1	19.1	19.1
Q8BQ46;G3UXT7;F6QCI0;Q8CFQ9;P56959	Q8BQ46;G3UXT7;F6QCI0;Q8CFQ9;P56959	2;1;1;1;1	2;1;1;1;1	2;1;1;1;1	RNA-binding protein FUS	Taf15;Fus	tr|Q8BQ46|Q8BQ46_MOUSE Protein Taf15 OS=Mus musculus GN=Taf15 PE=2 SV=1;tr|G3UXT7|G3UXT7_MOUSE RNA-binding protein FUS (Fragment) OS=Mus musculus GN=Fus PE=4 SV=1;tr|F6QCI0|F6QCI0_MOUSE Protein Taf15 (Fragment) OS=Mus musculus GN=Taf15 PE=4 SV=1;tr|Q8CFQ9|	490150	456880	8372100	1118700	765350	343680	490150	765350	5	2	2	2	1	1	1	1	1	2	1	1	1	1	1	2	1	1	1	1	1	2	6.3	6.3	6.3	58.6	557	557;130;324;517;518	0	16.706	4.7	4.7	1.6	4.7
Q8K4Z3	Q8K4Z3	6	6	6	NAD(P)H-hydrate epimerase	Apoa1bp	sp|Q8K4Z3|NNRE_MOUSE NAD(P)H-hydrate epimerase OS=Mus musculus GN=Apoa1bp PE=1 SV=1	21432000	7634200	2553000	19487000	5005500	1352300	7634200	5005500	1	6	6	6	6	6	2	6	5	2	6	6	2	6	5	2	6	6	2	6	5	2	27.7	27.7	27.7	30.972	282	282	0	44.351	27.7	27.7	6.7	27.7
Q8R1V4;Q5SVW9	Q8R1V4;Q5SVW9	5;4	5;4	4;4	Transmembrane emp24 domain-containing protein 4	Tmed4	sp|Q8R1V4|TMED4_MOUSE Transmembrane emp24 domain-containing protein 4 OS=Mus musculus GN=Tmed4 PE=2 SV=1;tr|Q5SVW9|Q5SVW9_MOUSE Transmembrane emp24 domain-containing protein 4 (Fragment) OS=Mus musculus GN=Tmed4 PE=3 SV=1	12720000	2910400	1615200	9214500	3636500	402180	2910400	3636500	2	5	5	4	5	4	2	5	4	2	5	4	2	5	4	2	4	4	2	4	4	2	23.8	23.8	16.3	26.022	227	227;170	0	53.971	23.8	16.3	8.8	23.8
Q91V41;A2AL34	Q91V41;A2AL34	10;6	10;6	10;6	Ras-related protein Rab-14	Rab14	sp|Q91V41|RAB14_MOUSE Ras-related protein Rab-14 OS=Mus musculus GN=Rab14 PE=1 SV=3;tr|A2AL34|A2AL34_MOUSE Ras-related protein Rab-14 OS=Mus musculus GN=Rab14 PE=3 SV=1	54006000	11564000	24290000	12544000	10941000	1150500	24290000	10941000	2	10	10	10	10	10	7	8	9	5	10	10	7	8	9	5	10	10	7	8	9	5	64.2	64.2	64.2	23.897	215	215;151	0	97.655	64.2	64.2	48.8	50.2
Q91YY4	Q91YY4	3	3	3	ATP synthase mitochondrial F1 complex assembly factor 2	Atpaf2	sp|Q91YY4|ATPF2_MOUSE ATP synthase mitochondrial F1 complex assembly factor 2 OS=Mus musculus GN=Atpaf2 PE=1 SV=1	4110500	1172400	387820	6670000	1358500	146410	1172400	1358500	1	3	3	3	3	3	1	3	3	2	3	3	1	3	3	2	3	3	1	3	3	2	11.1	11.1	11.1	33.289	289	289	0	23.104	11.1	11.1	3.8	11.1
Q99KF1	Q99KF1	3	2	2	Transmembrane emp24 domain-containing protein 9	Tmed9	sp|Q99KF1|TMED9_MOUSE Transmembrane emp24 domain-containing protein 9 OS=Mus musculus GN=Tmed9 PE=1 SV=2	2822900	400970	5256400	1557100	849360	70025	2822900	849360	1	3	2	2	3	2	2	3	2	1	2	2	2	2	2	1	2	2	2	2	2	1	16.2	8.9	8.9	27.127	235	235	0	14.354	16.2	8.9	8.9	16.2
Q99PT1	Q99PT1	7	7	7	Rho GDP-dissociation inhibitor 1	Arhgdia	sp|Q99PT1|GDIR1_MOUSE Rho GDP-dissociation inhibitor 1 OS=Mus musculus GN=Arhgdia PE=1 SV=3	48352000	1901800	17437000	28693000	2072400	422720	17437000	2072400	1	7	7	7	7	5	4	7	5	3	7	5	4	7	5	3	7	5	4	7	5	3	48	48	48	23.407	204	204	0	69.487	48	27	17.2	48
Q9CQ06	Q9CQ06	8	8	8	39S ribosomal protein L24, mitochondrial	Mrpl24	sp|Q9CQ06|RM24_MOUSE 39S ribosomal protein L24, mitochondrial OS=Mus musculus GN=Mrpl24 PE=2 SV=1	10900000	6619600	2564600	12075000	10117000	2164900	6619600	10117000	1	8	8	8	6	5	2	7	6	3	6	5	2	7	6	3	6	5	2	7	6	3	42.6	42.6	42.6	24.944	216	216	0	52.325	32.4	25.5	7.9	38.9
Q9CQA3	Q9CQA3	8	8	8	Succinate dehydrogenase [ubiquinone] iron-sulfur subunit, mitochondrial	Sdhb	sp|Q9CQA3|SDHB_MOUSE Succinate dehydrogenase [ubiquinone] iron-sulfur subunit, mitochondrial OS=Mus musculus GN=Sdhb PE=1 SV=1	2652700	1434200	3222800	24967000	2323900	779500	2652700	2323900	1	8	8	8	6	5	2	8	7	5	6	5	2	8	7	5	6	5	2	8	7	5	28	28	28	31.814	282	282	0	57.793	21.3	17	6.7	28
Q9CQD1	Q9CQD1	7	7	5	Ras-related protein Rab-5A	Rab5a	sp|Q9CQD1|RAB5A_MOUSE Ras-related protein Rab-5A OS=Mus musculus GN=Rab5a PE=1 SV=1	46581000	9095700	13995000	19958000	9050200	1132700	13995000	9050200	1	7	7	5	7	6	3	7	7	3	7	6	3	7	7	3	5	4	1	5	5	2	48.8	48.8	38.6	23.598	215	215	0	99.269	48.8	40	16.7	48.8
Q9CQE8;J3QNB0	Q9CQE8	5;2	5;2	5;2	UPF0568 protein C14orf166 homolog		sp|Q9CQE8|CN166_MOUSE UPF0568 protein C14orf166 homolog OS=Mus musculus PE=2 SV=1	17210000	8620900	7980800	19961000	9051700	5243700	8620900	9051700	2	5	5	5	5	5	3	5	4	4	5	5	3	5	4	4	5	5	3	5	4	4	23	23	23	28.152	244	244;244	0	47.184	23	23	15.6	23
Q9CQF3	Q9CQF3	6	6	6	Cleavage and polyadenylation specificity factor subunit 5	Nudt21	sp|Q9CQF3|CPSF5_MOUSE Cleavage and polyadenylation specificity factor subunit 5 OS=Mus musculus GN=Nudt21 PE=1 SV=1	25709000	1460000	11142000	18454000	1104300	315640	11142000	1104300	1	6	6	6	6	3	5	6	3	2	6	3	5	6	3	2	6	3	5	6	3	2	30.4	30.4	30.4	26.24	227	227	0	44.183	30.4	12.8	27.3	30.4
Q9CQQ7	Q9CQQ7	8	8	8	ATP synthase F(0) complex subunit B1, mitochondrial	Atp5f1	sp|Q9CQQ7|AT5F1_MOUSE ATP synthase F(0) complex subunit B1, mitochondrial OS=Mus musculus GN=Atp5f1 PE=1 SV=1	78885000	20223000	9256500	8243600	11928000	979450	20223000	8243600	1	8	8	8	8	8	2	7	7	2	8	8	2	7	7	2	8	8	2	7	7	2	28.5	28.5	28.5	28.948	256	256	0	59.538	28.5	28.5	7	25.4
Q9CQV8-2;Q9CQV8;A2A5N1	Q9CQV8-2;Q9CQV8;A2A5N1	7;7;5	2;2;2	1;1;1	14-3-3 protein beta/alpha;14-3-3 protein beta/alpha, N-terminally processed	Ywhab	sp|Q9CQV8-2|1433B_MOUSE Isoform Short of 14-3-3 protein beta/alpha OS=Mus musculus GN=Ywhab;sp|Q9CQV8|1433B_MOUSE 14-3-3 protein beta/alpha OS=Mus musculus GN=Ywhab PE=1 SV=3;tr|A2A5N1|A2A5N1_MOUSE 14-3-3 protein beta/alpha (Fragment) OS=Mus musculus GN=Yw	289070	216090	16504000	791540	264160	129150	289070	264160	3	7	2	1	3	3	7	4	3	4	1	1	2	2	1	1	1	1	1	1	1	1	22.5	8.6	5.7	27.854	244	244;246;159	0	12.205	12.7	11.9	22.5	15.6
Q9CR57	Q9CR57	6	6	6	60S ribosomal protein L14	Rpl14	sp|Q9CR57|RL14_MOUSE 60S ribosomal protein L14 OS=Mus musculus GN=Rpl14 PE=1 SV=3	4151100	3585900	41630000	82578000	8874500	1123100	4151100	8874500	1	6	6	6	4	3	2	6	4	3	4	3	2	6	4	3	4	3	2	6	4	3	29	29	29	23.564	217	217	0	49.322	20.3	15.7	9.7	29
Q9CY97-2;Q9CY97	Q9CY97-2;Q9CY97	4;4	4;4	4;4	RNA polymerase II subunit A C-terminal domain phosphatase SSU72	Ssu72	sp|Q9CY97-2|SSU72_MOUSE Isoform 2 of RNA polymerase II subunit A C-terminal domain phosphatase SSU72 OS=Mus musculus GN=Ssu72;sp|Q9CY97|SSU72_MOUSE RNA polymerase II subunit A C-terminal domain phosphatase SSU72 OS=Mus musculus GN=Ssu72 PE=2 SV=1	6433700	4079500	2868100	8563700	4784500	1264000	4079500	4784500	2	4	4	4	4	4	3	4	4	4	4	4	3	4	4	4	4	4	3	4	4	4	24.7	24.7	24.7	20.862	182	182;194	0	30.418	24.7	24.7	18.7	24.7
Q9CYN9	Q9CYN9	3	3	3	Renin receptor	Atp6ap2	sp|Q9CYN9|RENR_MOUSE Renin receptor OS=Mus musculus GN=Atp6ap2 PE=2 SV=2	2972400	719980	3253400	5018300	481900	123460	2972400	481900	1	3	3	3	3	2	1	3	1	1	3	2	1	3	1	1	3	2	1	3	1	1	8.9	8.9	8.9	39.091	350	350	0	18.352	8.9	4.9	2.3	8.9
Q9D0M3-2;Q9D0M3	Q9D0M3-2;Q9D0M3	5;5	5;5	5;5	Cytochrome c1, heme protein, mitochondrial	Cyc1	sp|Q9D0M3-2|CY1_MOUSE Isoform 2 of Cytochrome c1, heme protein, mitochondrial OS=Mus musculus GN=Cyc1;sp|Q9D0M3|CY1_MOUSE Cytochrome c1, heme protein, mitochondrial OS=Mus musculus GN=Cyc1 PE=1 SV=1	19981000	5674700	4974900	22117000	5435700	1923800	5674700	5435700	2	5	5	5	5	5	2	5	5	5	5	5	2	5	5	5	5	5	2	5	5	5	25.9	25.9	25.9	29.497	266	266;325	0	40.992	25.9	25.9	8.3	25.9
Q9D0R8	Q9D0R8	3	3	3	Protein LSM12 homolog	Lsm12	sp|Q9D0R8|LSM12_MOUSE Protein LSM12 homolog OS=Mus musculus GN=Lsm12 PE=1 SV=1	10284000	3764700	3510300	5073000	4144300	300490	3764700	4144300	1	3	3	3	3	3	2	3	3	1	3	3	2	3	3	1	3	3	2	3	3	1	20	20	20	21.701	195	195	0	27.439	20	20	11.3	20
Q9D172	Q9D172	4	4	4	ES1 protein homolog, mitochondrial	D10Jhu81e	sp|Q9D172|ES1_MOUSE ES1 protein homolog, mitochondrial OS=Mus musculus GN=D10Jhu81e PE=1 SV=1	12998000	3995400	1482400	21840000	5664500	1671800	3995400	5664500	1	4	4	4	3	3	2	4	3	2	3	3	2	4	3	2	3	3	2	4	3	2	24.4	24.4	24.4	28.09	266	266	0	26.499	16.2	15	6.8	24.4
Q9D287;D6RGA5	Q9D287	3;1	3;1	3;1	Pre-mRNA-splicing factor SPF27	Bcas2	sp|Q9D287|SPF27_MOUSE Pre-mRNA-splicing factor SPF27 OS=Mus musculus GN=Bcas2 PE=2 SV=1	3036100	635710	3155900	6444400	1752100	647510	3036100	1752100	2	3	3	3	3	2	3	3	3	2	3	2	3	3	3	2	3	2	3	3	3	2	16.9	16.9	16.9	26.131	225	225;78	0	24.09	16.9	11.1	16.9	16.9
Q9EQQ2	Q9EQQ2	2	2	2	Protein YIPF5	Yipf5	sp|Q9EQQ2|YIPF5_MOUSE Protein YIPF5 OS=Mus musculus GN=Yipf5 PE=2 SV=1	17626000	3674100	874570	5394400	3589800	789740	3674100	3589800	1	2	2	2	2	2	1	2	2	2	2	2	1	2	2	2	2	2	1	2	2	2	8.2	8.2	8.2	27.873	257	257	0	18.619	8.2	8.2	3.5	8.2
Q9ERI2;Q99P58	Q9ERI2	5;1	5;1	5;1	Ras-related protein Rab-27A	Rab27a	sp|Q9ERI2|RB27A_MOUSE Ras-related protein Rab-27A OS=Mus musculus GN=Rab27a PE=1 SV=1	3850200	1228600	926930	24284000	2507300	604580	1228600	2507300	2	5	5	5	4	3	1	5	5	3	4	3	1	5	5	3	4	3	1	5	5	3	24.9	24.9	24.9	25.017	221	221;218	0	39.527	19	14.5	5	24.9
Q9JIK9	Q9JIK9	4	4	4	28S ribosomal protein S34, mitochondrial	Mrps34	sp|Q9JIK9|RT34_MOUSE 28S ribosomal protein S34, mitochondrial OS=Mus musculus GN=Mrps34 PE=2 SV=1	3967300	1541500	4602600	6468200	1351100	554080	3967300	1351100	1	4	4	4	3	3	2	4	3	2	3	3	2	4	3	2	3	3	2	4	3	2	17	17	17	25.826	218	218	0	24.36	13.3	13.3	6.9	17
Q9JKB1;P58321	Q9JKB1;P58321	3;2	3;2	3;2	Ubiquitin carboxyl-terminal hydrolase isozyme L3;Ubiquitin carboxyl-terminal hydrolase isozyme L4	Uchl3;Uchl4	sp|Q9JKB1|UCHL3_MOUSE Ubiquitin carboxyl-terminal hydrolase isozyme L3 OS=Mus musculus GN=Uchl3 PE=1 SV=2;sp|P58321|UCHL4_MOUSE Ubiquitin carboxyl-terminal hydrolase isozyme L4 OS=Mus musculus GN=Uchl4 PE=2 SV=1	677890	415180	2136200	15011000	1347000	606980	677890	1347000	2	3	3	3	2	2	2	3	3	2	2	2	2	3	3	2	2	2	2	3	3	2	18.3	18.3	18.3	26.151	230	230;233	0	27.776	14.3	9.6	9.6	18.3
Q9QUM9;E0CXB1;E0CYT2	Q9QUM9;E0CXB1	10;8;1	10;8;1	10;8;1	Proteasome subunit alpha type-6	Psma6	sp|Q9QUM9|PSA6_MOUSE Proteasome subunit alpha type-6 OS=Mus musculus GN=Psma6 PE=1 SV=1;tr|E0CXB1|E0CXB1_MOUSE Proteasome subunit alpha type-6 OS=Mus musculus GN=Psma6 PE=1 SV=1	33864000	1436900	14353000	48848000	1840000	733290	14353000	1840000	3	10	10	10	10	4	5	10	4	3	10	4	5	10	4	3	10	4	5	10	4	3	41.5	41.5	41.5	27.372	246	246;227;53	0	73.455	41.5	16.7	24	41.5
Q9R0P9	Q9R0P9	7	7	7	Ubiquitin carboxyl-terminal hydrolase isozyme L1	Uchl1	sp|Q9R0P9|UCHL1_MOUSE Ubiquitin carboxyl-terminal hydrolase isozyme L1 OS=Mus musculus GN=Uchl1 PE=1 SV=1	88317000	25500000	3728800	86230000	29941000	6876200	25500000	29941000	1	7	7	7	7	6	3	7	6	6	7	6	3	7	6	6	7	6	3	7	6	6	41.7	41.7	41.7	24.838	223	223	0	86.264	41.7	35	16.6	41.7
Q9WTL7	Q9WTL7	7	7	7	Acyl-protein thioesterase 2	Lypla2	sp|Q9WTL7|LYPA2_MOUSE Acyl-protein thioesterase 2 OS=Mus musculus GN=Lypla2 PE=1 SV=1	17356000	6782000	4143000	2187300	9233100	889840	6782000	2187300	1	7	7	7	5	5	2	4	5	4	5	5	2	4	5	4	5	5	2	4	5	4	40.3	40.3	40.3	24.794	231	231	0	44.401	33.3	21.6	6.9	13.9
Q9Z1A1;B8JJG9;B8JJG7;B8JJG8;B8JJG6;F6QJV5;B8JJG3	Q9Z1A1;B8JJG9;B8JJG7;B8JJG8;B8JJG6	9;5;5;5;5;4;3	9;5;5;5;5;4;3	9;5;5;5;5;4;3		Tfg	tr|Q9Z1A1|Q9Z1A1_MOUSE Protein Tfg OS=Mus musculus GN=Tfg PE=1 SV=1;tr|B8JJG9|B8JJG9_MOUSE Protein Tfg (Fragment) OS=Mus musculus GN=Tfg PE=4 SV=1;tr|B8JJG7|B8JJG7_MOUSE Protein Tfg (Fragment) OS=Mus musculus GN=Tfg PE=4 SV=1;tr|B8JJG8|B8JJG8_MOUSE Protein	30801000	29288000	19363000	19773000	20949000	6056000	29288000	19773000	7	9	9	9	7	7	6	7	9	8	7	7	6	7	9	8	7	7	6	7	9	8	30.7	30.7	30.7	43.02	397	397;89;103;131;143;220;202	0	79.2	28	24.4	22.7	24.4
Q9Z2M7;Q91W01;O35621	Q9Z2M7	9;2;2	9;2;2	9;2;2	Phosphomannomutase 2	Pmm2	sp|Q9Z2M7|PMM2_MOUSE Phosphomannomutase 2 OS=Mus musculus GN=Pmm2 PE=1 SV=1	1127500	2157900	7308000	38202000	3324600	1244100	2157900	3324600	3	9	9	9	4	5	5	9	5	4	4	5	5	9	5	4	4	5	5	9	5	4	39.7	39.7	39.7	27.656	242	242;202;262	0	63.2	15.7	20.2	19	39.7
[truncated: 9 more columns]
