# Supplementary material for: Antipsychotic olanzapine-induced misfolding of proinsulin in the endoplasmic reticulum accounts for atypical development of diabetes
Source: eLife. 2020 Nov 17;9:e60970. doi: 10.7554/eLife.60970 (PMC7671685; doi:10.7554/eLife.60970)
Supplement: Supplementary file 2. [file elife-60970-supp2.xlsx]

## Sheet: Sheet1
Reagent type or resource	Designation	Source or reference	Identifier	Additional information
Sequence based reagent	Preproinsulin 1	This paper	Cloning primer Fw	GAAGATATCCAGAGACCATCAGCAAGCAG
Sequence based reagent	Preproinsulin 1	This paper	Cloning primer Rv	CCGCTCGAGGCAGGAAGCAGAATTCCAGA
Sequence based reagent	Preproinsulin 2	This paper	Cloning primer Fw	CCGGAATTCCAGCAAGCAGGAAGGTTATTG
Sequence based reagent	Preproinsulin 2	This paper	Cloning primer Rv	CCGCTCGAGAGAGGGGTAGGCTGGGTAGT
Sequence based reagent	Proinsulin 1	This paper	Cloning primer Fw	GAAGATATCAACATGTTTGTCAAACAGCATCTTTG
Sequence based reagent	Proinsulin 1	This paper	Cloning primer Rv	CCGCTCGAGGCAGGAAGCAGAATTCCAGA
Sequence based reagent	Proinsulin 2	This paper	Cloning primer Fw	CCGGAATTCAACATGTTTGTCAAGCAGCACCTTTG
Sequence based reagent	Proinsulin 2	This paper	Cloning primer Rv	CCGCTCGAGAGAGGGGTAGGCTGGGTAGT
Sequence based reagent	B chain 1	This paper	Cloning primer Fw	CACACCCAAGTCCTGACGCCGTGAAGTGGAGG
Sequence based reagent	B chain 1	This paper	Cloning primer Rv	CCTCCACTTCACGGCGTCAGGACTTGGGTGTG
Sequence based reagent	B chain 2	This paper	Cloning primer Fw	ACACCCATGTCCTGACGCCGTGAAGTGGAGGAC
Sequence based reagent	B chain 2	This paper	Cloning primer Rv	GTCCTCCACTTCACGGCGTCAGGACATGGGTGT
